# Supplementary material for: Epigenetic modulation of type-1 diabetes via a dual effect on pancreatic macrophages and β cells
Source: eLife journal article supplement (doi:10.7554/elife.04631), 2014-11-19
Supplement: figures [file elife-04631-figures-v2.pdf]

---

## Figures and figure supplements

Epigenetic modulation of type-1 diabetes via a dual effect on pancreatic macrophages and  $\beta$  cells

**Wenxian Fu, et al.**

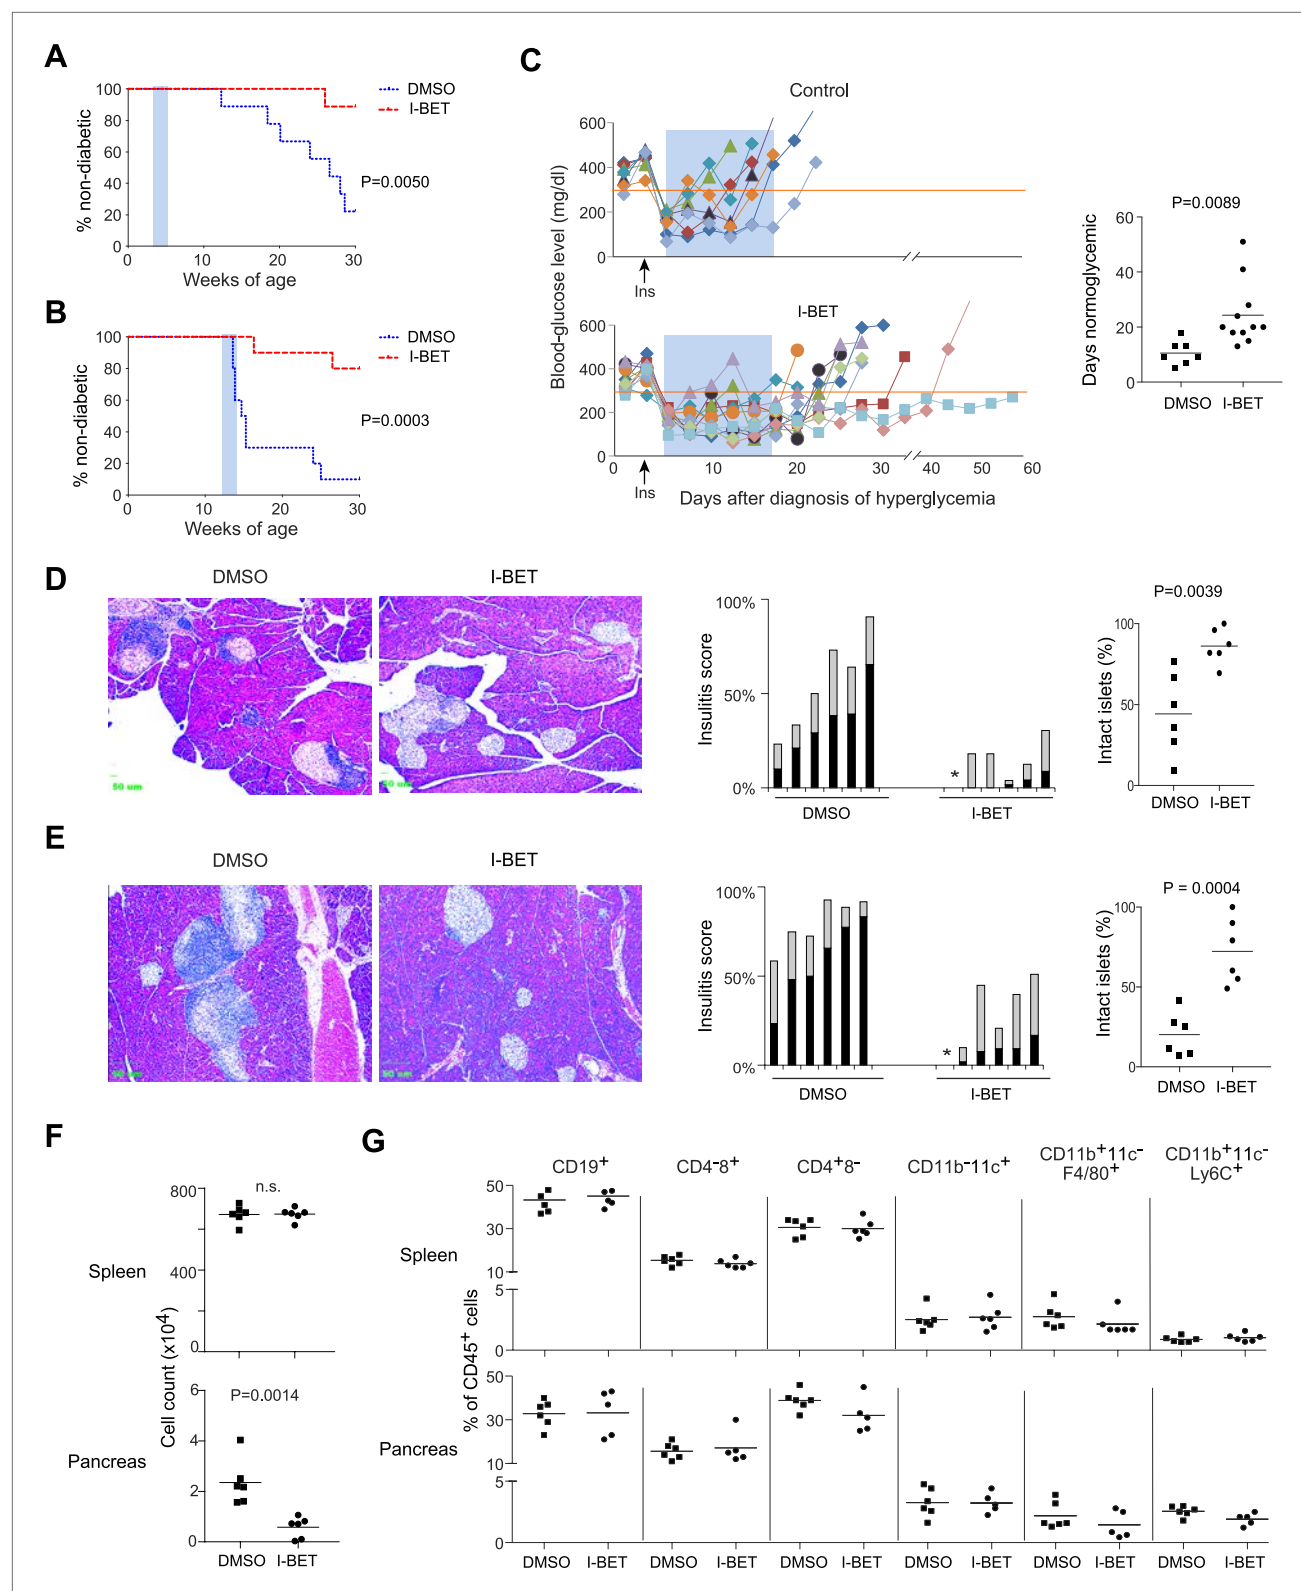

**Figure 1.** I-BET151 inhibits diabetes and insulinitis in NOD mice. Female NOD mice were treated with I-BET151 in DMSO (10 mg/kg daily) or just DMSO from 3–5 weeks (**A** and **D**) or 12–14 weeks (**B** and **E**) of age. (**A** and **B**) Pre-diabetic mice. Hyperglycemia was monitored until 30 weeks of age.  $n = 10$  per group. Blue shading = treatment window. (**C**) Recent-onset diabetic mice. Left: Individual blood-glucose curves. An insulin pellet was implanted subcutaneously within 1 day of diabetes diagnosis (arrow). 2 days later, I-BET151 (10 mg/kg) or DMSO was administered daily for 2 weeks (shaded blue). Right: duration of

Figure 1. Continued on next page

*Figure 1. Continued*

normoglycemia.  $n = 7$  or  $11$ . (**D** and **E**) Insulinitis was visualized by H&E staining of paraffin sections. Left: representative histology. Middle: insulinitis scores for individual mice. Grey = peri-insulinitis; black = insulinitis. The asterisk indicates no insulinitis in any of the sections examined. Right: summary of the proportions of intact islets for individual mice. (**F**) Left: Total CD45<sup>+</sup> cells from the spleen (upper panel) or pancreatic islets (lower panel) from mice treated with I-BET151 or DMSO as per **Figure 1B**, and analyzed at 14 weeks.  $n = 6$ . (**G**) Summary data on the major immune-cell subsets as a fraction of CD45<sup>+</sup> cells, from the spleen (upper panels) or pancreas (lower panels).  $n = 5$  or  $6$ . p values in **A** and **B** are from Gehan-Breslow-Wilcoxon tests and in **C–G** are from Student's *t* tests.

DOI: [10.7554/eLife.04631.003](https://doi.org/10.7554/eLife.04631.003)

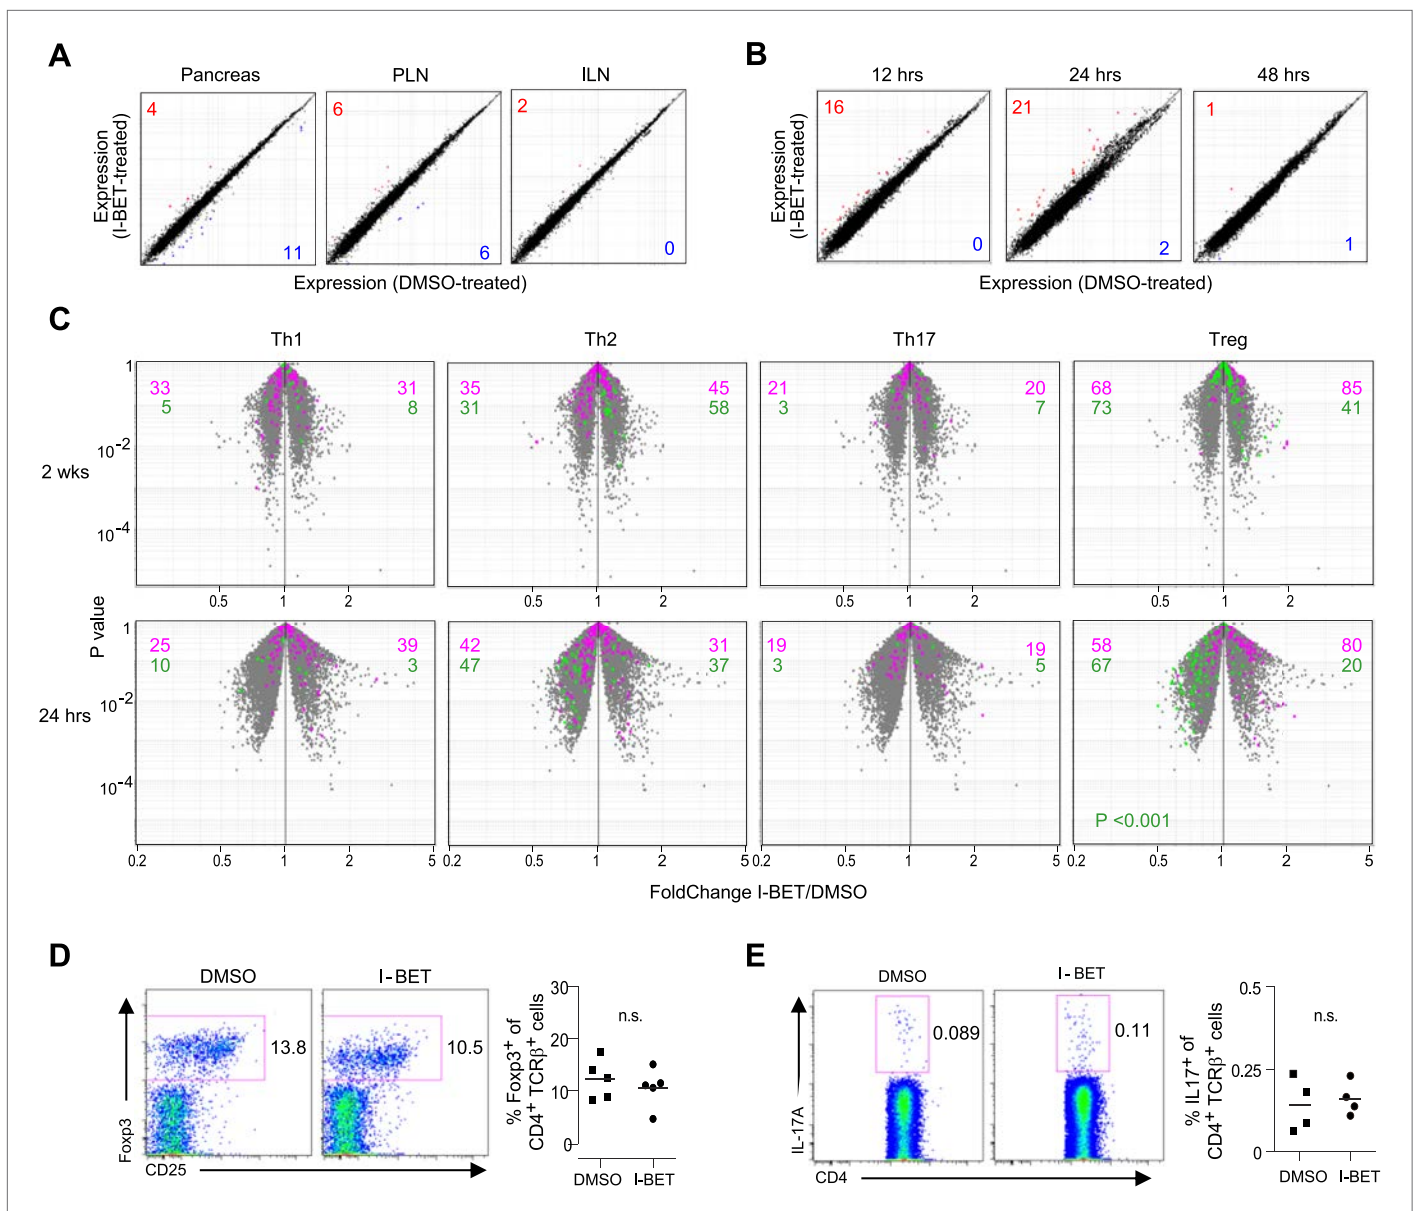

**Figure 2.** Little impact of BET-protein inhibition on CD4<sup>+</sup> T cells in NOD mice. **(A)** Microarray-based transcriptional profiling of TCR<sup>+</sup>CD4<sup>+</sup> cells sorted from pancreata, pancreatic lymph nodes (PLNs) and inguinal lymph nodes (ILNs). Comparison plot of I-BET151- and DMSO-treated mice as per **Figure 1B** and analyzed at 14 weeks of age. Red, transcripts increased >twofold by I-BET151; blue, transcripts >twofold decreased. **(B)** Analogous plots of TCR<sup>+</sup>CD4<sup>+</sup> cells sorted from the pancreas of mice given a single I-BET151 (10 mg/kg) or DMSO injection, and analyzed 12, 24 or 48 hr later. **(C)** Th1, Th2, Th17 or Treg signatures (see 'Materials and methods') were superimposed on volcano plots comparing the transcriptomes of TCR<sup>+</sup>CD4<sup>+</sup> cells from the pancreas of mice treated with I-BET151 or DMSO either as per **Figure 1B** and analyzed at 14 weeks of age (upper panels) or with a single injection and analyzed 24 hr later (lower panels). Purple: over-represented signature transcripts; Green: under-represented signature transcripts. **(D and E)** Proportions of Treg **(D)** or Th17 **(E)** cells within the TCR<sup>+</sup>CD4<sup>+</sup> population in the pancreas of I-BET151- or DMSO-treated mice. Left, representative cytofluorometric dot plots; right, summary data. n = 4–5. p values in panel **C** are from the Chi-squared test (the single significant value is shown; all others were not significant) and in **D–E** from Student's t tests.

DOI: 10.7554/eLife.04631.004

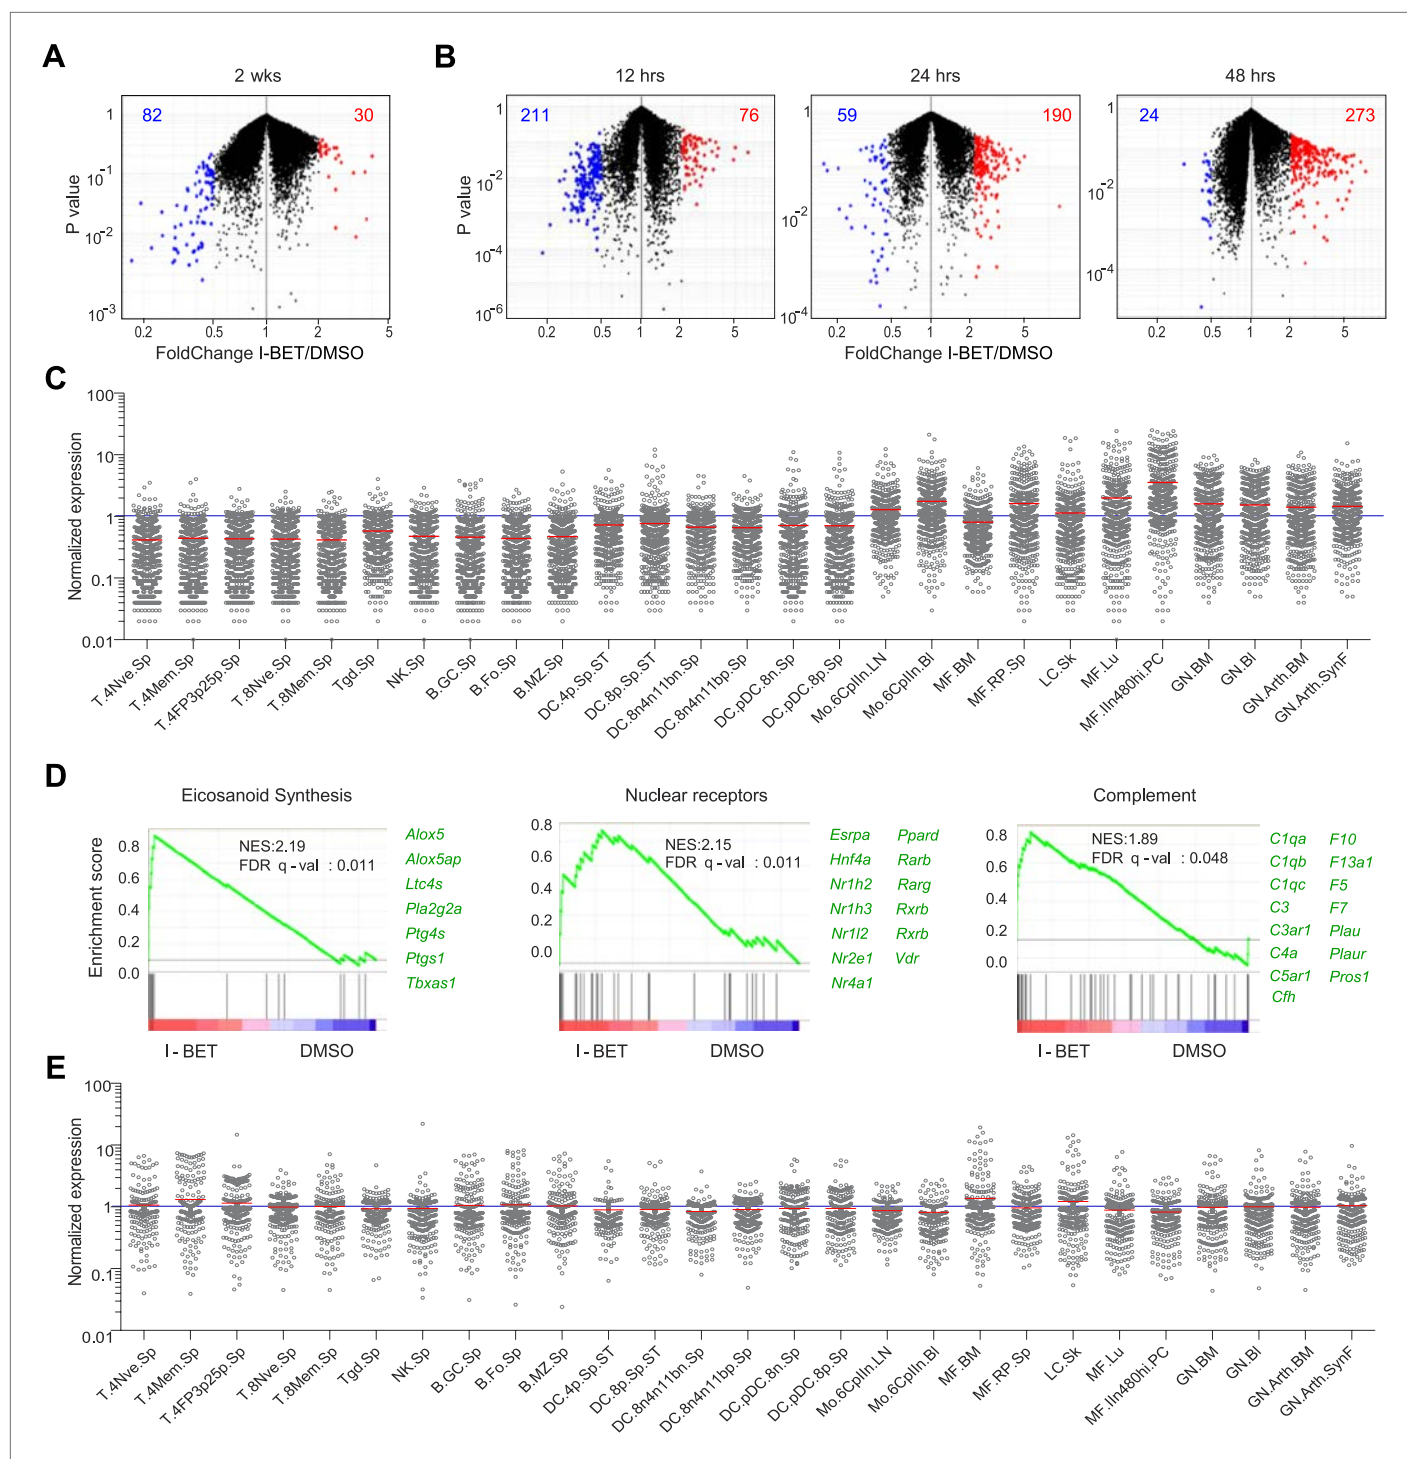

**Figure 3.** I-BET151 treatment promotes an MF-like, anti-inflammatory transcriptional program in pancreatic CD45<sup>+</sup> cells. **(A and B)** A volcano plot comparing the transcriptomes of pancreatic CD45<sup>+</sup> cells from mice treated with I-BET151 or DMSO as per **Figure 1B**. Red: transcripts increased >twofold; blue: transcripts decreased >twofold; numbers of modulated transcripts are indicated in the corresponding color. **(B)** Analogous plots for mice given a single injection of I-BET151 (10 mg/kg) or DMSO only, and analyzed 12, 24 or 48 hr later. **(C)** Cell-type distribution of the totality of transcripts whose expression was increased >twofold in panels **A** and **B** (red). Expression data for and definition of the various cell-types came from ImmGen ([www.immgen.org](http://www.immgen.org)). Langerhans cells of the skin (LC.SK) have been re-positioned as per recent data ([Gautier et al., 2012](#)). Expression values were row-normalized. **(D)** GSEA of the totality of transcripts increased in pancreatic CD45<sup>+</sup> cells of mice treated with I-BET151 (red dots in panels **A** and **B**). NES, normalized enrichment score. Representative genes showing increased expression on the right. **(E)** A plot analogous to that in panel **C** for the totality of transcripts >twofold under-represented in drug-treated mice (blue dots in panels **A** and **B**).

DOI: [10.7554/eLife.04631.005](https://doi.org/10.7554/eLife.04631.005)

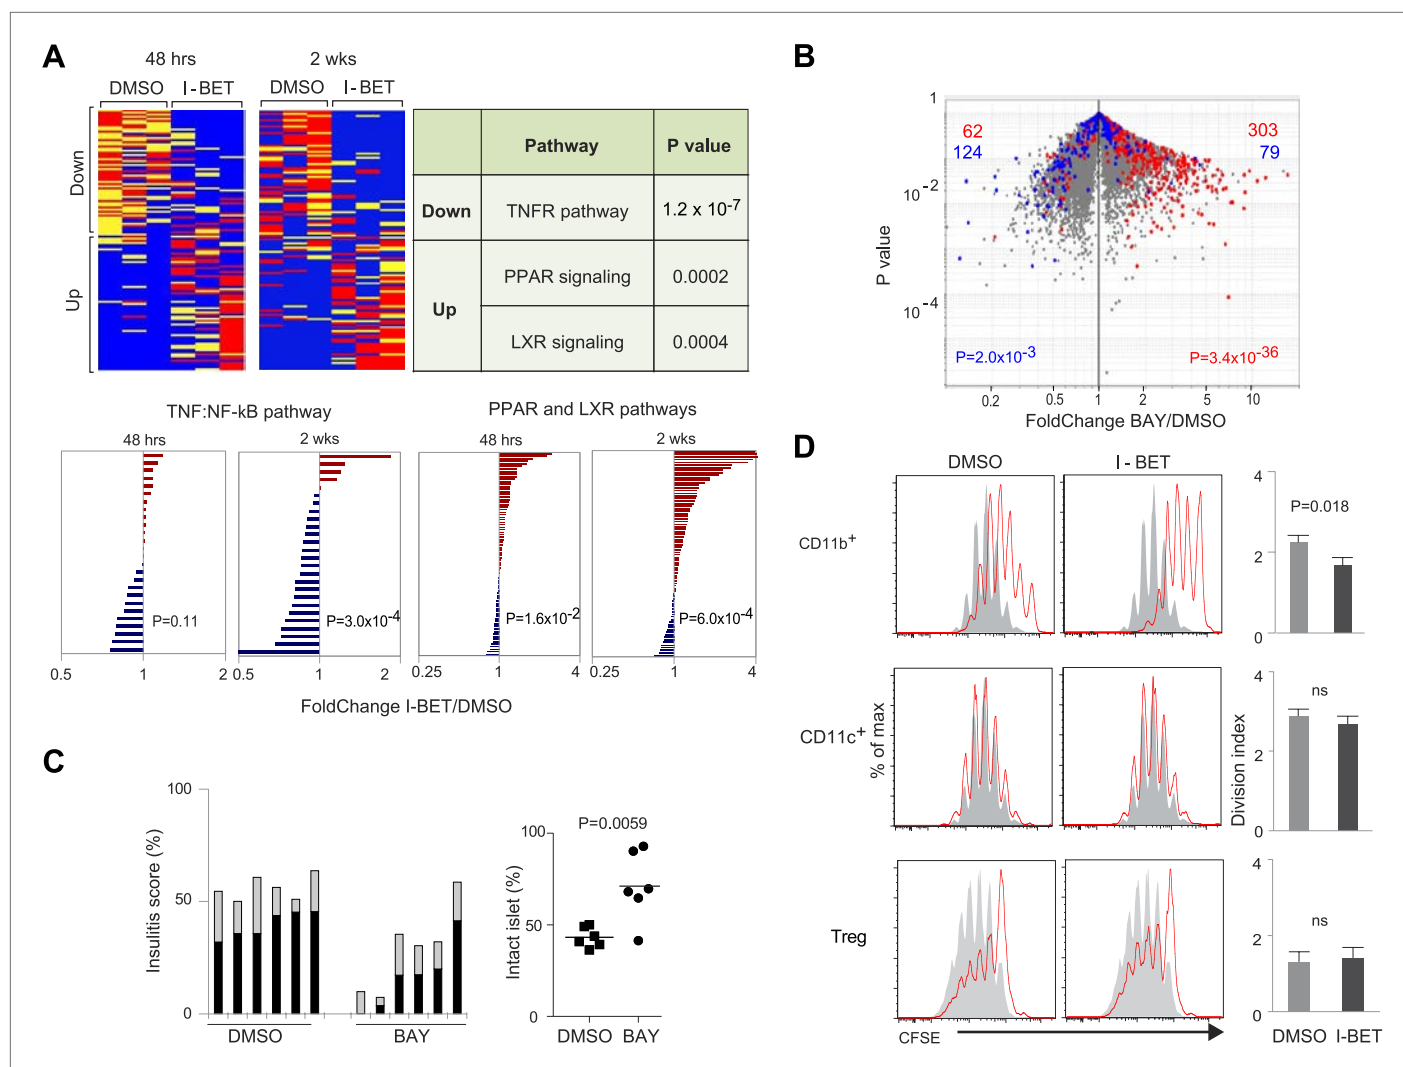

**Figure 4.** The NF- $\kappa$ B signaling pathway is a major focus of I-BET151's influence on NOD leukocytes. **(A)** Upper panels: The inhibitor's effect on NF- $\kappa$ B-regulated genes—defined as per <http://www.bu.edu/nf-kb/gene-resources/target-genes>. Left, relevant transcripts from pancreatic CD45<sup>+</sup> cells of NOD mice treated long- or short-term with I-BET151 or DMSO. Red: over-represented; blue: under-represented. 2 wk: long-term, treatment as per **Figure 1B**; 48 hr: short-term, treatment with a single 10 mg/kg dose and analyzed 48 hr later. Right, signaling pathways represented by the enriched or impoverished transcripts in the data to the left, via Ingenuity pathway analysis ([www.ingenuity.com](http://www.ingenuity.com)). Lower panels: Gene sets corresponding to the TNF $\alpha$ -induced canonical NF- $\kappa$ B pathway (**Schaefer et al., 2009**) or the PPAR and LXR pathways (<http://www.genome.jp/kegg/pathway/hsa/hsa03320.html>) were retrieved from the Broad Institute's Molecular Signatures Database (<http://www.broadinstitute.org/gsea/msigdb>), and their expression levels in CD45<sup>+</sup> cells from pancreas of I-BET151- or vehicle-treated mice plotted. **(B)** 12-week-old NOD mice were injected once ip with BAY 11-7082 (10 mg/kg), sacrificed 24 hr later, and CD45<sup>+</sup> cells from the pancreas isolated and transcriptionally profiled. A volcano plot comparing treatment with BAY 11-7082 and DMSO, with genes >twofold increased (in red) or decreased (in blue) by I-BET151 treatment (pooled from all time-points of **Figure 3A,B**) superimposed. **(C)** Effect of a single dose of 10 mg/kg BAY 11-7082 on insulinitis in 12-week-old NOD mice, analyzed 24 hr after injection. Left: insulinitis scores. Right: summary data for the fraction of islets with no infiltrate. Grey, peri-insulitis; Black, insulitis. **(D)** Suppression of in vitro T cell proliferation by cell populations isolated from the pancreas of I-BET151- or DMSO- treated mice (as per **Figure 1B**). The CD11b<sup>+</sup>CD11c<sup>-</sup> (top), CD11b<sup>-</sup>CD11c<sup>+</sup> (middle) and TCR $\beta$ <sup>+</sup>CD4<sup>+</sup>CD25<sup>+</sup> (bottom) fractions of CD45<sup>+</sup> cells were sorted. To the left are representative plots of CFSE dilution; to the right are summary data quantifying division indices (see 'Materials and methods' for details). p values in **A** and **B** are from the chi-squared test, and in **C** and **D** are from the Student's t test.

DOI: [10.7554/eLife.04631.006](https://doi.org/10.7554/eLife.04631.006)

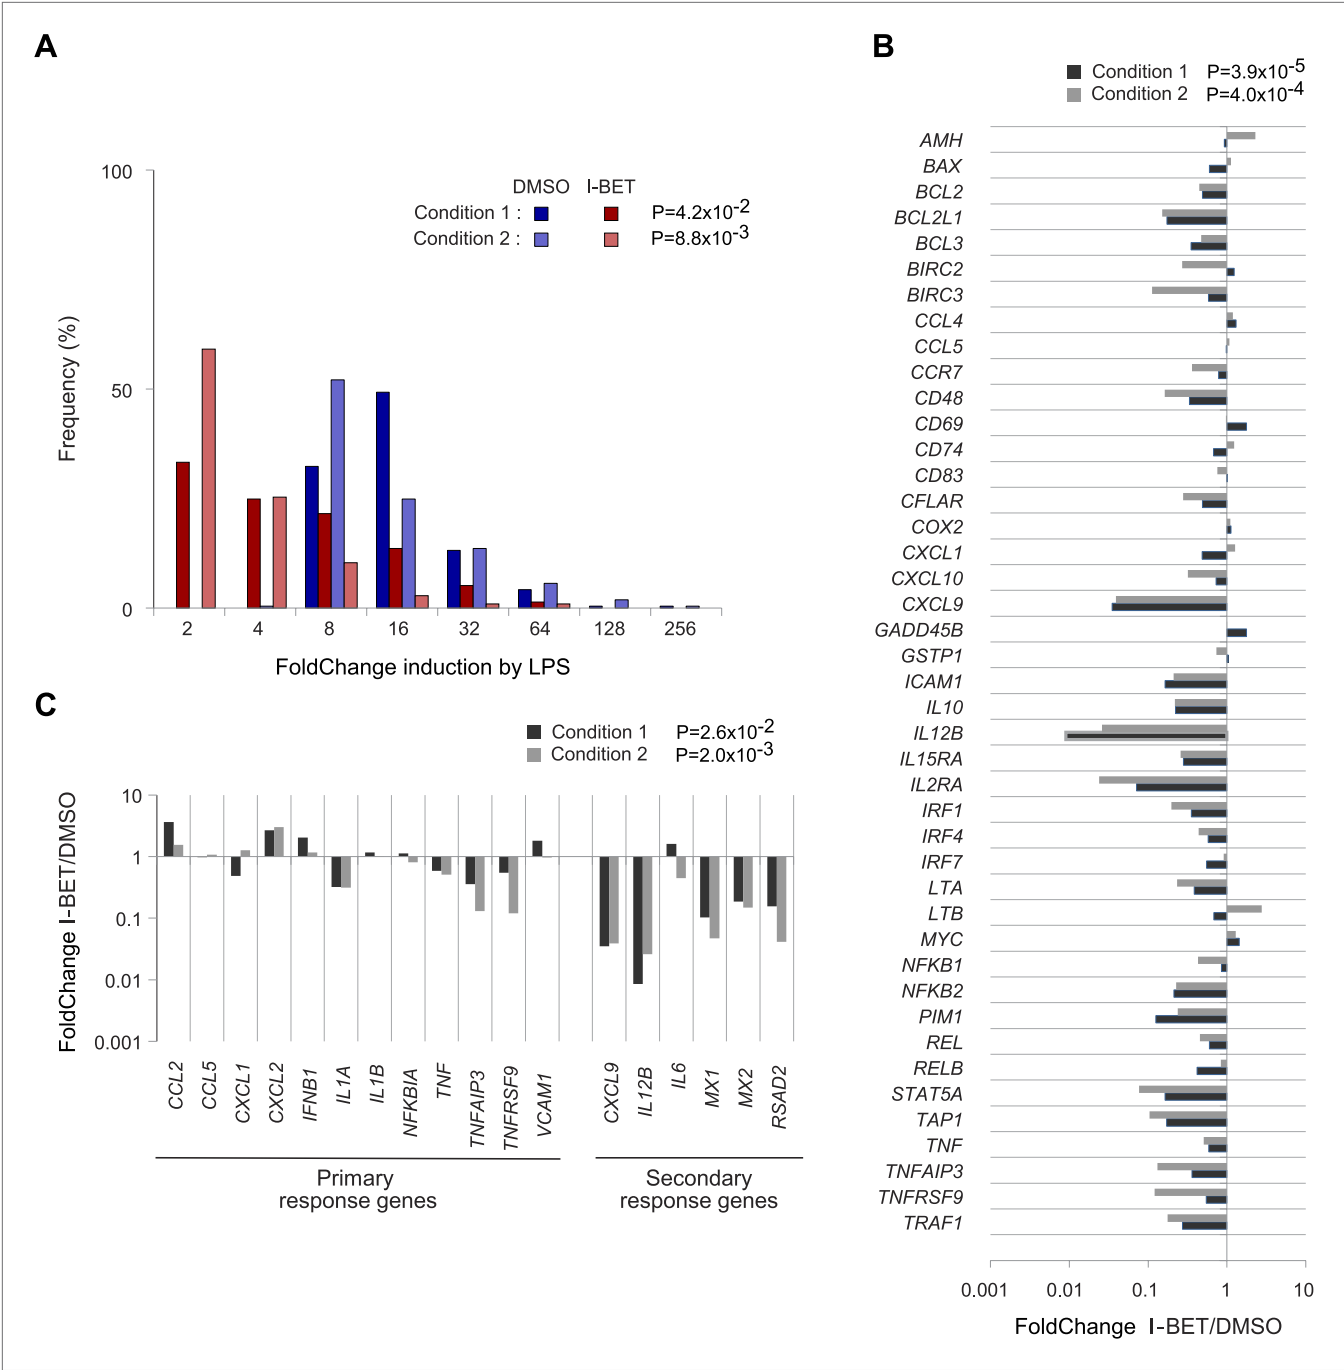

**Figure 5.** Effects of I-BET151 on human monocyte-derived MFs. Cultures of human MFs were differentiated from peripheral-blood-derived CD14<sup>+</sup> cells, pre-cultured for 30 min with I-BET151 (red bars) or just DMSO (blue bars), and stimulated for another 4 hr after the addition of LPS (100 ng/ml) or vehicle only. Microarray data from two conditions, as indicated and detailed in 'Materials and methods'. **(A)** Distribution of FCs of I-BET151/DMSO for LPS-induced genes (according to the data on human monocyte-derived MFs treated with LPS or just vehicle). **(B)** FCs of I-BET151/DMSO of the human orthologues of the set of murine NF- $\kappa$ B-regulated genes illustrated in **Figure 4A**. **(C)** Effects of I-BET151 on primary and secondary LPS-response genes (defined as per [Hargreaves et al., 2009; Ramirez-Carrozzi et al., 2009]).  
DOI: 10.7554/eLife.04631.007



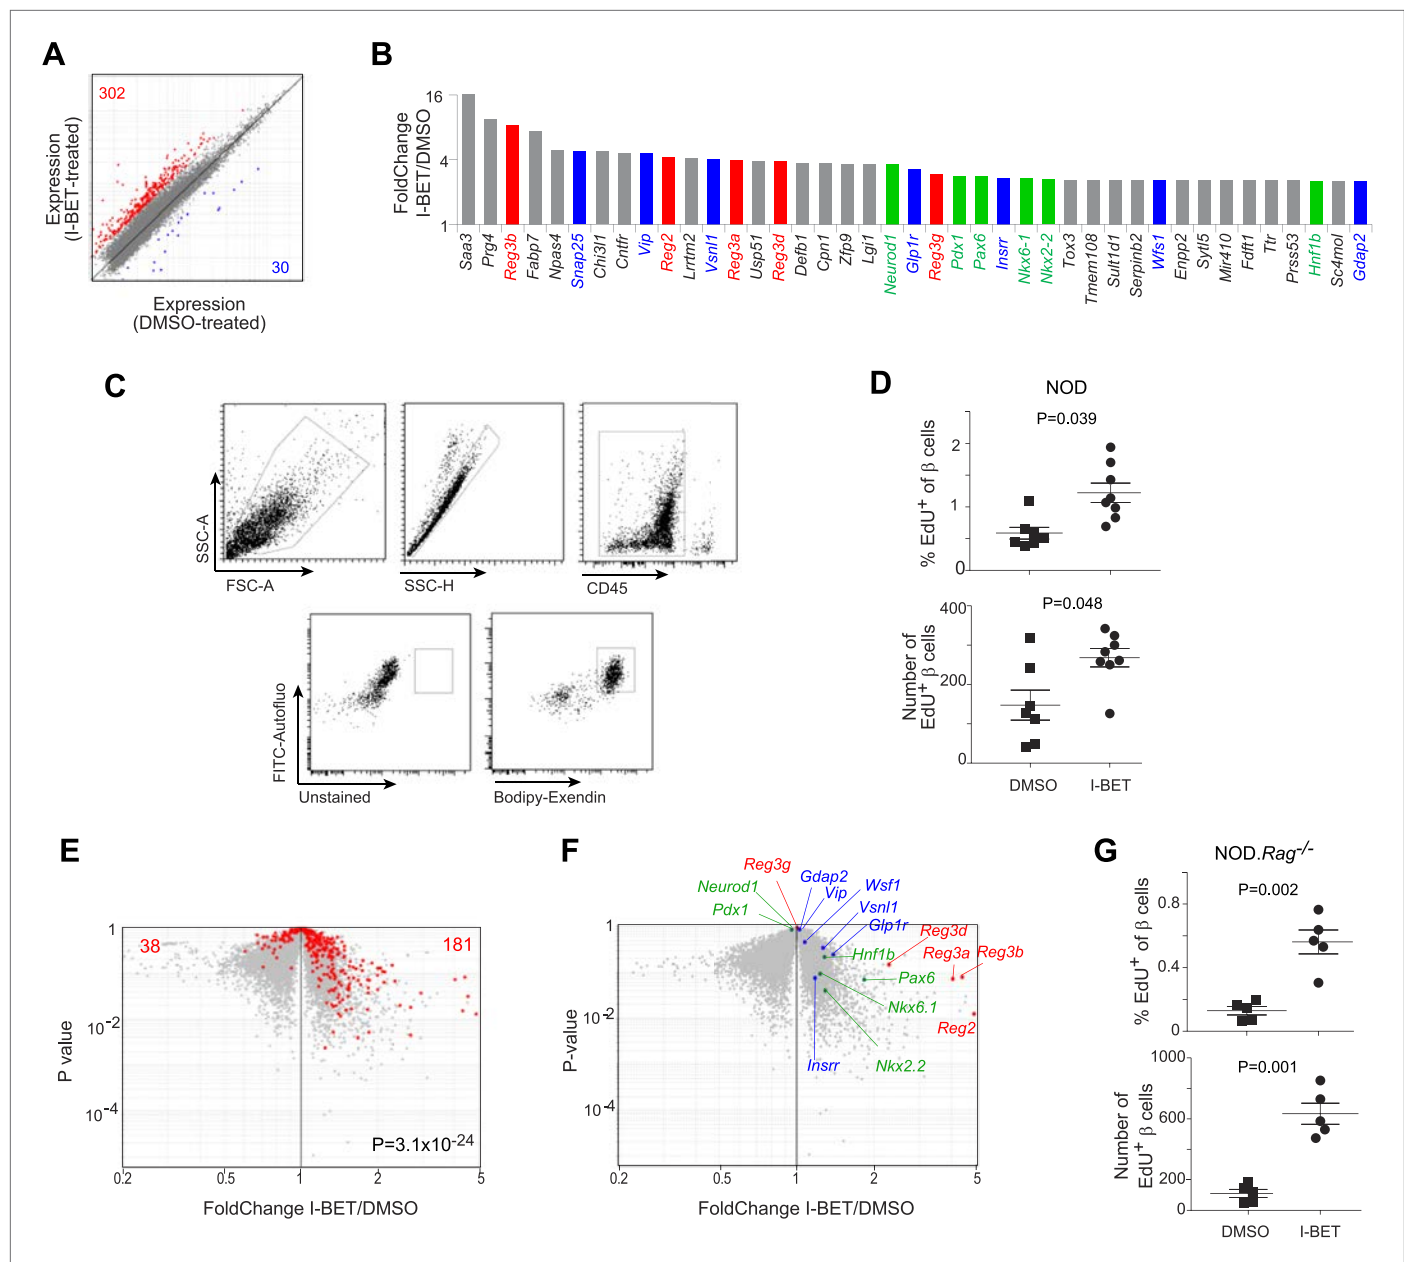

**Figure 6.** BET-protein inhibition promotes regeneration of islet  $\beta$  cells. **(A)** Pancreatic  $\beta$  cells were cytofluorometrically sorted from mice treated with I-BET151 or DMSO as per **Figure 1B**, and microarray-based transcriptional profiling performed. Red: transcripts increased >twofold by I-BET151; blue, transcripts >twofold decreased. **(B)** NOD  $\beta$ -cell transcripts increased by I-BET151 ranked by FC vis-à-vis DMSO treatment. Red, regenerating islet-derived (Reg) transcripts; green, transcripts encoding transcription factors important for  $\beta$ -cell differentiation and function; blue, transcripts encoding proteins that enhance insulin production. **(C, D, G)** Cytofluorometric quantification of EdU<sup>+</sup>  $\beta$  cells from NOD **(D)** or NOD.Rag<sup>-/-</sup> **(G)** mice treated with I-BET151 or DMSO as in **Figure 1B** and injected with EdU during the last 24 hr n = 5–8. Panel **C** shows the sorting strategy. **(E)** The set of red transcripts from panel **A** was superimposed on volcano plots comparing gene expression by  $\beta$  cells from NOD.Rag<sup>-/-</sup> mice treated as in **Figure 1B** with I-BET151 vs DMSO. **(F)** Relevant I-BET151-induced transcripts highlighted in panel **B** are situated on the volcano plot of panel **E**. **(G)** p values: \*<0.05; \*\*<0.01; \*\*\*<0.001—from the Student's t test for panels **D** and **G**, and from the chi-squared test for panel **E**.

DOI: 10.7554/eLife.04631.008



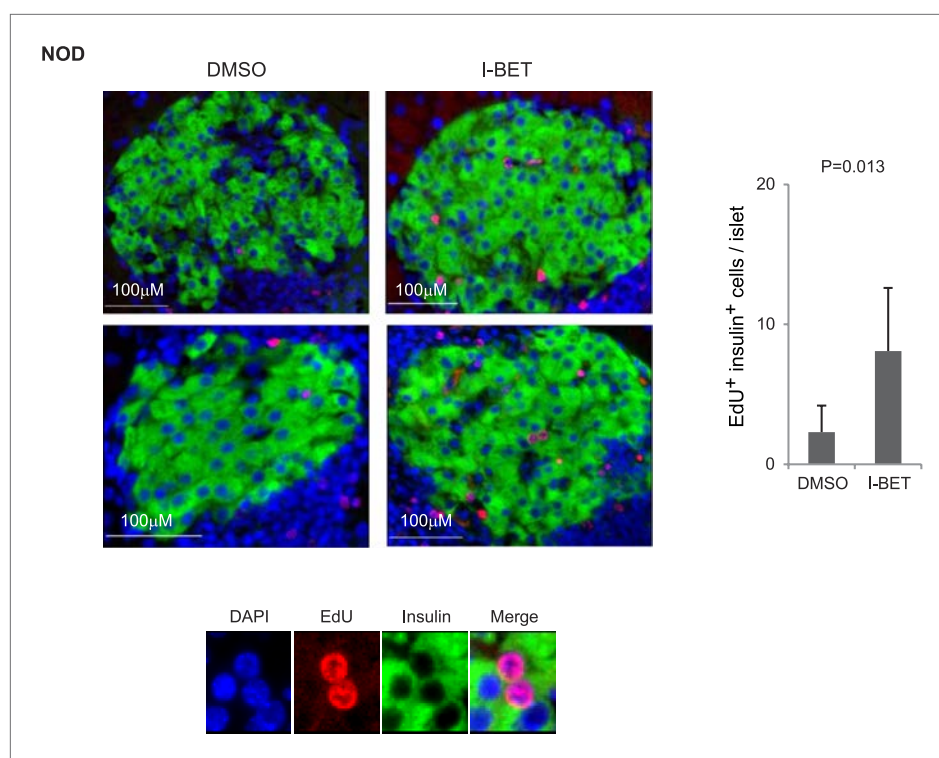

**Figure 6—figure supplement 1.** Histologic analysis of  $\beta$ -cell proliferation in response to I-BET151 in NOD mice. NOD mice were treated with I-BET151 or DMSO as in **Figure 1B**. EdU was administered during the last 24 hr. Frozen sections of pancreas were stained for insulin and EdU. Left, representative islet images; two for each condition; right, summary quantification. Small images in color are legends for insulin, EdU and DAPI, respectively. Red, EdU; green, insulin; blue, DAPI.

DOI: [10.7554/eLife.04631.009](https://doi.org/10.7554/eLife.04631.009)

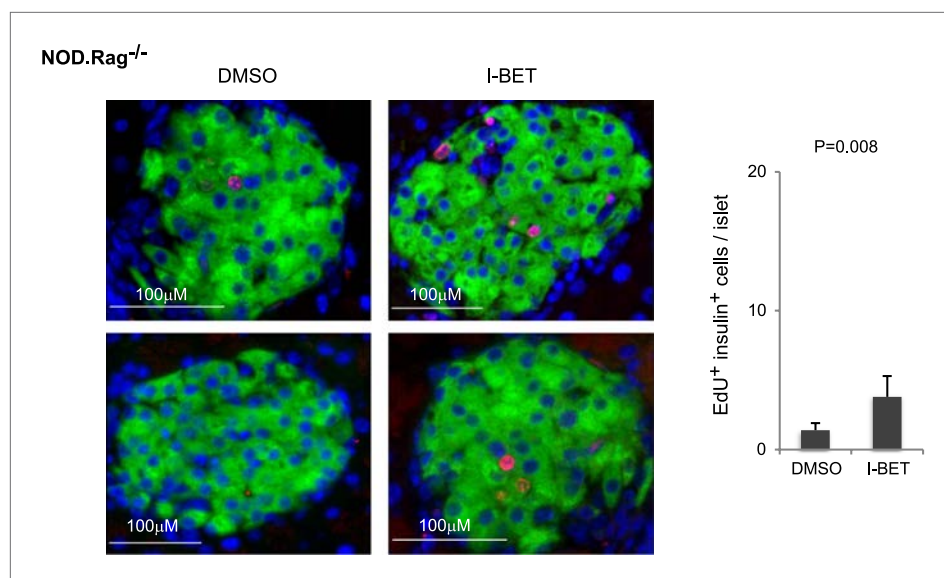

**Figure 6—figure supplement 2.** Histologic analysis of  $\beta$ -cell proliferation in response to I-BET151 in NOD. Rag<sup>-/-</sup> mice. NOD.Rag<sup>-/-</sup> mice were treated with I-BET151 or DMSO as in **Figure 1B**. EdU was administered during the last 24 hr. Frozen sections of pancreas were stained for insulin and EdU. Left, representative islet images, two for each condition; right, summary quantification.

DOI: [10.7554/eLife.04631.010](https://doi.org/10.7554/eLife.04631.010)
