# Supplementary material for: Epigenetic modulation of type-1 diabetes via a dual effect on pancreatic macrophages and β cells
Source: eLife journal article supplement (doi:10.7554/elife.04631), 2014-11-19
Supplement: supp [file elife-04631-supp-v1.zip]

**Supplementary File 3: Expression of NF- $\kappa$ B target genes in  
pancreatic CD45<sup>+</sup> cells of NOD mice treated with I-BET151**

| 2 wk treatment |                |                 |         | 48 hr treatment |                |                 |         |
|----------------|----------------|-----------------|---------|-----------------|----------------|-----------------|---------|
| Probe ID       | Gene<br>Symbol | FC<br>IBET/DMSO | P value | Probe ID        | Gene<br>Symbol | FC<br>IBET/DMSO | P value |
| 10563597       | Saa3           | 3.19            | 0.082   | 10563597        | Saa3           | 5.04            | 0.064   |
| 10355403       | Fn1            | 1.79            | 0.200   | 10351206        | Selp           | 3.67            | 0.070   |
| 10489204       | Tgm2           | 1.60            | 0.057   | 10358434        | Pla2g4a        | 2.86            | 0.115   |
| 10560685       | Bcl3           | 1.58            | 0.344   | 10572897        | Hmox1          | 2.71            | 0.144   |
| 10569102       | Irf7           | 1.55            | 0.068   | 10435704        | Cd80           | 2.59            | 0.044   |
| 10478633       | Mmp9           | 1.49            | 0.227   | 10487588        | Il1a           | 2.53            | 0.020   |
| 10508734       | Ptafr          | 1.48            | 0.178   | 10355403        | Fn1            | 2.31            | 0.065   |
| 10569646       | Ccnd1          | 1.46            | 0.159   | 10476395        | Bmp2           | 2.04            | 0.135   |
| 10351206       | Selp           | 1.20            | 0.688   | 10450242        | C4b            | 1.92            | 0.295   |
| 10501164       | Csf1           | 1.20            | 0.301   | 10469816        | Il1rn          | 1.87            | 0.121   |
| 10487597       | Il1b           | 1.17            | 0.307   | 10569646        | Ccnd1          | 1.84            | 0.263   |
| 10582658       | Agt            | 1.17            | 0.178   | 10590635        | Ccr5           | 1.72            | 0.369   |
| 10485405       | Cd44           | 1.17            | 0.194   | 10597575        | Plcd1          | 1.66            | 0.054   |
| 10464583       | Gstp1          | 1.14            | 0.441   | 10579958        | Il15           | 1.59            | 0.043   |
| 10583519       | Icam1          | 1.14            | 0.228   | 10350516        | Ptgs2          | 1.52            | 0.193   |
| 10560575       | Relb           | 1.14            | 0.587   | 10413047        | Plau           | 1.43            | 0.267   |
| 10541885       | Scnn1a         | 1.13            | 0.038   | 10593169        | Apoc3          | 1.42            | 0.314   |
| 10510516       | Slc2a5         | 1.13            | 0.352   | 10505438        | Orm1           | 1.39            | 0.185   |
| 10474295       | Wt1            | 1.11            | 0.554   | 10469322        | Vim            | 1.35            | 0.256   |
| 10364903       | Amh            | 1.11            | 0.405   | 10501164        | Csf1           | 1.34            | 0.470   |
| 10469322       | Vim            | 1.10            | 0.162   | 10409021        | Tpmt           | 1.33            | 0.005   |
| 10444407       | Ager           | 1.09            | 0.484   | 10430660        | Pdgfb          | 1.32            | 0.460   |
| 10381172       | Stat5a         | 1.09            | 0.345   | 10541885        | Scnn1a         | 1.31            | 0.137   |
| 10435704       | Cd80           | 1.09            | 0.787   | 10439312        | Cd86           | 1.30            | 0.110   |
| 10375331       | Il12b          | 1.09            | 0.580   | 10580282        | Junb           | 1.28            | 0.410   |
| 10400405       | Nfkbia         | 1.08            | 0.481   | 10444890        | Ier3           | 1.27            | 0.128   |
| 10444244       | Tap1           | 1.08            | 0.185   | 10582997        | Casp4          | 1.26            | 0.445   |
| 10539244       | Tacr1          | 1.07            | 0.697   | 10441815        | Sod2           | 1.24            | 0.143   |
| 10493820       | S100a6         | 1.07            | 0.227   | 10510516        | Slc2a5         | 1.22            | 0.025   |
| 10379524       | Ccl11          | 1.07            | 0.856   | 10349102        | Bcl2           | 1.22            | 0.366   |
| 10523151       | Cxcl1          | 1.06            | 0.738   | 10482772        | Nr4a2          | 1.20            | 0.686   |
| 10593169       | Apoc3          | 1.06            | 0.734   | 10400405        | Nfkbia         | 1.16            | 0.187   |
| 10385837       | Il13           | 1.06            | 0.763   | 10572077        | Naf1           | 1.15            | 0.292   |
| 10390763       | Ccr7           | 1.06            | 0.676   | 10539244        | Tacr1          | 1.15            | 0.119   |
| 10531407       | Cxcl9          | 1.05            | 0.936   | 10558992        | Muc2           | 1.13            | 0.609   |
| 10384725       | Rel            | 1.03            | 0.203   | 10379524        | Ccl11          | 1.13            | 0.463   |
| 10469289       | Il15ra         | 1.03            | 0.823   | 10571705        | Irf2           | 1.10            | 0.458   |
| 10351182       | Sele           | 1.03            | 0.910   | 10600901        | Ar             | 1.08            | 0.836   |
| 10590635       | Ccr5           | 1.01            | 0.906   | 10513739        | Tnc            | 1.08            | 0.274   |
| 10444752       | Ltb            | 1.01            | 0.932   | 10501608        | Vcam1          | 1.07            | 0.734   |
| 10441815       | Sod2           | 1.01            | 0.851   | 10497878        | Il2            | 1.06            | 0.705   |
| 10480760       | Traf2          | 1.01            | 0.978   | 10461402        | Fth1           | 1.05            | 0.600   |
| 10597575       | Plcd1          | 1.01            | 0.870   | 10474295        | Wt1            | 1.04            | 0.810   |
| 10571705       | Irf2           | 1.00            | 0.948   | 10385837        | Il13           | 1.04            | 0.560   |
| 10502299       | Nfkb1          | 1.00            | 0.997   | 10358027        | Elf3           | 1.04            | 0.691   |
| 10357878       | Adora1         | 1.00            | 1.000   | 10346562        | Cflar          | 1.00            | 0.954   |
| 10501608       | Vcam1          | 1.00            | 1.000   | 10582658        | Agt            | 0.99            | 0.910   |
| 10450508       | Lta            | 1.00            | 0.979   | 10469289        | Il15ra         | 0.99            | 0.962   |
| 10456005       | Cd74           | 0.99            | 0.788   | 10379228        | Nos2           | 0.99            | 0.836   |
| 10480734       | Ptgs2          | 0.99            | 0.861   | 10398121        | Bdkrb1         | 0.99            | 0.842   |
| 10404840       | Cd83           | 0.98            | 0.816   | 10351182        | Sele           | 0.99            | 0.883   |
| 10558992       | Muc2           | 0.98            | 0.868   | 10523151        | Cxcl1          | 0.97            | 0.706   |
| 10349603       | Il10           | 0.97            | 0.946   | 10357878        | Adora1         | 0.96            | 0.633   |
| 10513739       | Tnc            | 0.97            | 0.916   | 10375331        | Il12b          | 0.95            | 0.783   |
| 10361292       | Cr2            | 0.97            | 0.936   | 10563303        | Bax            | 0.95            | 0.609   |

|          |         |      |       |          |         |      |       |
|----------|---------|------|-------|----------|---------|------|-------|
| 10531415 | Cxcl10  | 0.97 | 0.965 | 10444407 | Ager    | 0.95 | 0.598 |
| 10376060 | Irf1    | 0.97 | 0.535 | 10488655 | Bcl2l1  | 0.95 | 0.699 |
| 10461402 | Fth1    | 0.97 | 0.831 | 10487613 | Pdyn    | 0.93 | 0.248 |
| 10385870 | Irf1    | 0.97 | 0.816 | 10590801 | Birc3   | 0.93 | 0.669 |
| 10563303 | Bax     | 0.96 | 0.816 | 10598038 | COX2    | 0.92 | 0.175 |
| 10349102 | Bcl2    | 0.96 | 0.845 | 10480734 | Ptgs    | 0.90 | 0.088 |
| 10379511 | Ccl2    | 0.96 | 0.877 | 10443527 | Pim1    | 0.89 | 0.655 |
| 10346551 | Cflar   | 0.96 | 0.867 | 10346551 | Cflar   | 0.89 | 0.414 |
| 10598038 | COX2    | 0.96 | 0.388 | 10385870 | Irf1    | 0.88 | 0.294 |
| 10424400 | Myc     | 0.94 | 0.661 | 10569102 | Irf7    | 0.87 | 0.539 |
| 10363475 | Prf1    | 0.94 | 0.594 | 10456005 | Cd74    | 0.86 | 0.060 |
| 10487613 | Pdyn    | 0.94 | 0.628 | 10351658 | Cd48    | 0.86 | 0.161 |
| 10510580 | Tnfrsf9 | 0.94 | 0.743 | 10364903 | Amh     | 0.85 | 0.266 |
| 10572077 | Naf1    | 0.94 | 0.858 | 10560685 | Bcl3    | 0.85 | 0.218 |
| 10398121 | Bdkrb1  | 0.93 | 0.574 | 10464583 | Gstp1   | 0.84 | 0.138 |
| 10590801 | Birc3   | 0.93 | 0.426 | 10381172 | Stat5a  | 0.84 | 0.016 |
| 10439312 | Cd86    | 0.93 | 0.760 | 10384725 | Rel     | 0.83 | 0.050 |
| 10481949 | Traf1   | 0.93 | 0.610 | 10379721 | Ccl4    | 0.81 | 0.467 |
| 10409021 | Tpmt    | 0.93 | 0.749 | 10359434 | Fasl    | 0.80 | 0.567 |
| 10488655 | Bcl2l1  | 0.92 | 0.085 | 10357043 | Bcl2    | 0.80 | 0.127 |
| 10497931 | Cflar   | 0.91 | 0.776 | 10368144 | Tnfaip3 | 0.79 | 0.213 |
| 10482772 | Nr4a2   | 0.91 | 0.652 | 10583519 | Icam1   | 0.79 | 0.047 |
| 10593015 | Cd3g    | 0.91 | 0.552 | 10480760 | Traf2   | 0.78 | 0.018 |
| 10368199 | Myb     | 0.91 | 0.696 | 10490672 | Arfrp1  | 0.78 | 0.027 |
| 10490672 | Arfrp1  | 0.91 | 0.675 | 10389231 | Ccl3    | 0.78 | 0.640 |
| 10379228 | Nos2    | 0.91 | 0.121 | 10366586 | Irfng   | 0.78 | 0.707 |
| 10389207 | Ccl5    | 0.90 | 0.596 | 10497931 | Cflar   | 0.77 | 0.087 |
| 10357043 | Bcl2    | 0.90 | 0.267 | 10463599 | Nfkb2   | 0.76 | 0.004 |
| 10413047 | Plau    | 0.89 | 0.479 | 10531415 | Cxcl10  | 0.76 | 0.651 |
| 10351658 | Cd48    | 0.89 | 0.438 | 10389207 | Ccl5    | 0.75 | 0.494 |
| 10523156 | Cxcl2   | 0.88 | 0.858 | 10593015 | Cd3g    | 0.75 | 0.253 |
| 10358027 | Elf3    | 0.88 | 0.089 | 10531407 | Cxcl9   | 0.74 | 0.657 |
| 10443527 | Pim1    | 0.87 | 0.798 | 10590791 | Birc2   | 0.74 | 0.097 |
| 10579958 | Il15    | 0.87 | 0.515 | 10404389 | Irf4    | 0.74 | 0.001 |
| 10346562 | Cflar   | 0.86 | 0.149 | 10390763 | Ccr7    | 0.73 | 0.186 |
| 10600901 | Ar      | 0.85 | 0.616 | 10424400 | Myc     | 0.72 | 0.122 |
| 10444890 | Ier3    | 0.84 | 0.254 | 10511363 | Penk    | 0.72 | 0.280 |
| 10350516 | Ptgs2   | 0.82 | 0.103 | 10502299 | Nfkb1   | 0.72 | 0.013 |
| 10368144 | Tnfaip3 | 0.81 | 0.485 | 10548333 | Cd69    | 0.71 | 0.199 |
| 10511363 | Penk    | 0.80 | 0.429 | 10368199 | Myb     | 0.69 | 0.089 |
| 10359434 | Fasl    | 0.80 | 0.346 | 10361292 | Cr2     | 0.69 | 0.349 |
| 10404389 | Irf4    | 0.79 | 0.225 | 10376060 | Irf1    | 0.66 | 0.068 |
| 10364950 | Gadd45b | 0.77 | 0.401 | 10560575 | Relb    | 0.65 | 0.020 |
| 10580282 | Junb    | 0.77 | 0.486 | 10363475 | Prf1    | 0.65 | 0.048 |
| 10590791 | Birc2   | 0.77 | 0.312 | 10404840 | Cd83    | 0.64 | 0.086 |
| 10583100 | Mmp8    | 0.76 | 0.171 | 10510580 | Tnfrsf9 | 0.62 | 0.011 |
| 10379721 | Ccl4    | 0.76 | 0.352 | 10364950 | Gadd45b | 0.61 | 0.022 |
| 10548333 | Cd69    | 0.76 | 0.396 | 10349603 | Il10    | 0.61 | 0.366 |
| 10582997 | Casp4   | 0.75 | 0.469 | 10481949 | Traf1   | 0.58 | 0.003 |
| 10450501 | Tnf     | 0.75 | 0.393 | 10450508 | Lta     | 0.58 | 0.023 |
| 10450242 | C4b     | 0.75 | 0.635 | 10444244 | Tap1    | 0.57 | 0.005 |
| 10366586 | Irfng   | 0.69 | 0.156 | 10444752 | Ltb     | 0.56 | 0.029 |
| 10389231 | Ccl3    | 0.63 | 0.168 | 10450501 | Tnf     | 0.50 | 0.008 |
