# Supplementary material for: Epigenetic modulation of type-1 diabetes via a dual effect on pancreatic macrophages and β cells
Source: eLife journal article supplement (doi:10.7554/elife.04631), 2014-11-19
Supplement: supp [file elife-04631-supp-v1.zip]

## Supplementary File 1: Genes over-represented in pancreatic CD45<sup>+</sup> cells of NOD mice treated with I-BET151

| 2 wk treatment |             |               |         | 12 hr treatment |             |               |         | 24 hr treatment |             |               |         | 48 hr treatment |             |               |         |
|----------------|-------------|---------------|---------|-----------------|-------------|---------------|---------|-----------------|-------------|---------------|---------|-----------------|-------------|---------------|---------|
| Probe ID       | Gene Symbol | FC IBET/DM SO | P value | Probe ID        | Gene Symbol | FC IBET/DM SO | P value | Probe ID        | Gene Symbol | FC IBET/DM SO | P value | Probe ID        | Gene Symbol | FC IBET/DM SO | P value |
| 10566934       | Lyve1       | 8.27          | 0.321   | 10349157        | Serpina2    | 6.192         | 0.051   | 10499861        | S100a9      | 15.636        | 0.097   | 10521667        | Bst1        | 7.226         | 0.028   |
| 10368343       | Arg1        | 5.126         | 0.005   | 10492964        | Cd5l        | 4.972         | 0.006   | 10435497        | Stfa2l1     | 14.978        | 0.199   | 10492964        | Cd5l        | 6.619         | 0.047   |
| 10393936       | Cbr2        | 5.048         | 0.198   | 10474700        | Thbs1       | 4.842         | 0.056   | 10493831        | S100a8      | 14.5          | 0.102   | 10541614        | Clec4d      | 5.867         | 0.068   |
| 10566026       | Folr2       | 4.831         | 0.202   | 10578264        | Msr1        | 3.707         | 0.036   | 10523156        | Cxcl2       | 12.399        | 0.340   | 10451953        | Lrg1        | 5.72          | 0.038   |
| 10422728       | Dab2        | 4.226         | 0.017   | 10569020        | Ifitm6      | 3.621         | 0.013   | 10347291        | Cxcr2       | 9.996         | 0.136   | 10349157        | Serpina2    | 5.673         | 0.014   |
| 10552494       | Klk9        | 3.636         | 0.049   | 10528207        | Cd36        | 3.546         | 0.034   | 10583100        | Mmp8        | 8.724         | 0.403   | 10474700        | Thbs1       | 5.606         | 0.066   |
| 10523717       | Spp1        | 3.551         | 0.005   | 10451953        | Lrg1        | 3.417         | 0.128   | 10458382        | Cd14        | 8.504         | 0.095   | 10363224        | Fabp7       | 5.422         | 0.009   |
| 10523134       | Pf4         | 3.365         | 0.142   | 10547657        | C3ar1       | 3.348         | 0.074   | 10451953        | Lrg1        | 8.428         | 0.013   | 10392464        | Fam20a      | 5.258         | 0.063   |
| 10492964       | Cd5l        | 3.333         | 0.323   | 10387855        | Alox5       | 3.221         | 0.006   | 10563597        | Saa3        | 7.984         | 0.040   | 10547153        | Alox5       | 5.244         | 0.026   |
| 10365769       | Hal         | 3.305         | 0.397   | 10422728        | Dab2        | 3.019         | 0.114   | 10478633        | Mmp9        | 7.694         | 0.085   | 10466130        | Ms4a8a      | 5.174         | 0.005   |
| 10385583       | Ltc4s       | 3.302         | 0.168   | 10518751        | Car6        | 3             | 0.010   | 10547664        | Clec4e      | 6.815         | 0.013   | 10578264        | Msr1        | 5.117         | 0.047   |
| 10563597       | Saa3        | 3.194         | 0.082   | 10532711        | Cmk1r1      | 2.959         | 0.022   | 10568165        | Zg16        | 6.555         | 0.153   | 10563597        | Saa3        | 5.044         | 0.064   |
| 10547657       | C3ar1       | 2.94          | 0.153   | 10534927        | Pilra       | 2.958         | 0.092   | 10497463        | Cpb1        | 6.318         | 0.096   | 10358339        | Cfh         | 5.038         | 0.054   |
| 10560242       | C5ar1       | 2.883         | 0.005   | 10446282        | Emr1        | 2.829         | 0.091   | 10436100        | Retnlg      | 6.198         | 0.275   | 10475890        | Mertk       | 4.852         | 0.056   |
| 10389222       | Ccl6        | 2.827         | 0.066   | 10389214        | Ccl9        | 2.824         | 0.127   | 10501020        | Chi3l3      | 6.05          | 0.104   | 10514275        | Ptplad2     | 4.826         | 0.003   |
| 10521667       | Bst1        | 2.823         | 0.058   | 10523134        | Pf4         | 2.761         | 0.128   | 10501544        | Amy2a5      | 5.994         | 0.067   | 10400844        | Pygl        | 4.763         | 0.026   |
| 10537410       | Tbxas1      | 2.808         | 0.155   | 10547664        | Clec4e      | 2.746         | 0.005   | 10517573        | Cela3b      | 5.982         | 0.148   | 10489463        | Slpi        | 4.684         | 0.029   |
| 10495054       | Rhoc        | 2.771         | 0.073   | 10581266        | Tppp3       | 2.737         | 0.049   | 10438730        | Sst         | 5.967         | 0.153   | 10376950        | Pmp22       | 4.547         | 0.072   |
| 10389214       | Ccl9        | 2.753         | 0.044   | 10393936        | Cbr2        | 2.679         | 0.018   | 10448124        | Fpr1        | 5.888         | 0.388   | 10586118        | Calml4      | 4.487         | 0.005   |
| 10418506       | Stab1       | 2.595         | 0.225   | 10372988        | Slc16a7     | 2.673         | 0.057   | 10389222        | Ccl6        | 5.793         | 0.031   | 10471721        | Ptgs1       | 4.417         | 0.060   |
| 10547664       | Clec4e      | 2.51          | 0.083   | 10570982        | Fgfr1       | 2.647         | 0.157   | 10501500        | Amy2a5      | 5.785         | 0.520   | 10536494        | Cav2        | 4.366         | 0.068   |
| 10578264       | Msr1        | 2.441         | 0.135   | 10408693        | F13a1       | 2.613         | 0.143   | 10551531        | Sycn        | 5.721         | 0.028   | 10517791        | Padi4       | 4.336         | 0.020   |
| 10363224       | Fabp7       | 2.432         | 0.381   | 10521667        | Bst1        | 2.601         | 0.094   | 10397882        | Chga        | 5.648         | 0.024   | 10499854        | S100a1      | 4.257         | 0.017   |
| 10517517       | C1qa        | 2.363         | 0.437   | 10560242        | C5ar1       | 2.577         | 0.017   | 10481278        | Cel         | 5.615         | 0.103   | 10446282        | Emr1        | 4.237         | 0.026   |
| 10548385       | Olr1        | 2.252         | 0.069   | 10508651        | Sdc3        | 2.568         | 0.065   | 10521667        | Bst1        | 5.5           | 0.118   | 10440491        | App         | 4.138         | 0.070   |
| 10534493       | Ccl24       | 2.248         | 0.229   | 10389222        | Ccl6        | 2.563         | 0.030   | 10501494        | Amy2b       | 5.337         | 0.025   | 10543239        | Tcfec       | 4.119         | 0.093   |
| 10517513       | C1qc        | 2.229         | 0.416   | 10499189        | Fcrls       | 2.557         | 0.091   | 10539200        | Reg1        | 5.308         | 0.242   | 10534927        | Pilra       | 4.058         | 0.029   |
| 10419854       | Slc7a8      | 2.215         | 0.054   | 10517791        | Padi4       | 2.552         | 0.051   | 10581355        | Ctrl        | 5.031         | 0.152   | 10488382        | Cd93        | 4.049         | 0.094   |
| 10508651       | Sdc3        | 2.154         | 0.287   | 10572130        | Lpl         | 2.528         | 0.019   | 10560242        | C5ar1       | 5.001         | 0.087   | 10469457        | Plxdc2      | 4.015         | 0.024   |
| 10517508       | C1qb        | 2.15          | 0.227   | 10367400        | Mmp19       | 2.521         | 0.114   | 10518050        | Cela2a      | 4.953         | 0.376   | 10500204        | Ecm1        | 3.992         | 0.027   |
|                |             |               |         | 10601385        | Tlr13       | 2.518         | 0.032   | 10541614        | Clec4d      | 4.901         | 0.009   | 10392808        | Cd300ld     | 3.975         | 0.100   |
|                |             |               |         | 10596148        | Trf         | 2.51          | 0.143   | 10460947        | Pygm        | 4.87          | 0.287   | 10532711        | Cmk1r1      | 3.89          | 0.052   |
|                |             |               |         | 10489878        | Ptgs1       | 2.50          | 0.062   | 10537014        | Cpa2        | 4.86          | 0.027   | 10388254        | Aspa        | 3.86          | 0.027   |
|                |             |               |         | 10392560        | Abca9       | 2.49          | 0.021   | 10466659        | Gda         | 4.84          | 0.117   | 10528207        | Cd36        | 3.81          | 0.094   |
|                |             |               |         | 10481772        | Garnl3      | 2.48          | 0.055   | 10396831        | Arg2        | 4.74          | 0.124   | 10438017        | Fgd4        | 3.80          | 0.101   |
|                |             |               |         | 10365769        | Hal         | 2.45          | 0.032   | 10349968        | Chi3l1      | 4.67          | 0.496   | 10360040        | Fcgr3       | 3.79          | 0.025   |
|                |             |               |         | 10458382        | Cd14        | 2.45          | 0.012   | 10363224        | Fabp7       | 4.27          | 0.293   | 10569014        | Ifitm2      | 3.78          | 0.022   |
|                |             |               |         | 10547153        | Alox5       | 2.44          | 0.090   | 10449467        | C1ps        | 4.21          | 0.133   | 10570982        | Fgfr1       | 3.72          | 0.041   |
|                |             |               |         | 10452648        | Emilin2     | 2.43          | 0.070   | 10537627        | Prss2       | 4.14          | 0.313   | 10355214        | Idh1        | 3.71          | 0.083   |
|                |             |               |         | 10557862        | Itgam       | 2.39          | 0.120   | 10474700        | Thbs1       | 4.12          | 0.252   | 10358421        | Rgs18       | 3.67          | 0.001   |
|                |             |               |         | 10607868        | Tlr8        | 2.34          | 0.028   | 10600852        | 30028010l   | 4.06          | 0.232   | 10351206        | Selp        | 3.67          | 0.070   |
|                |             |               |         | 10570291        | F10         | 2.33          | 0.155   | 10537051        | Cpa1        | 4.03          | 0.219   | 10422164        | Ednrb       | 3.66          | 0.042   |
|                |             |               |         | 10517513        | C1qc        | 2.30          | 0.083   | 10601385        | Tlr13       | 4.02          | 0.175   | 10349968        | Chi3l1      | 3.64          | 0.002   |
|                |             |               |         | 10387536        | Cd68        | 2.29          | 0.076   | 10349157        | Serpina2    | 4.01          | 0.023   | 10436456        | Pros1       | 3.64          | 0.040   |
|                |             |               |         | 10534935        | Pilrb1      | 2.28          | 0.095   | 10562709        | Cd33        | 4.00          | 0.007   | 10605848        | Vsig4       | 3.57          | 0.048   |
|                |             |               |         | 10355403        | Fn1         | 2.27          | 0.122   | 10466606        | Anxa1       | 3.97          | 0.418   | 10395414        | Tmem195     | 3.57          | 0.029   |

|          |           |      |       |          |             |      |       |          |             |      |       |
|----------|-----------|------|-------|----------|-------------|------|-------|----------|-------------|------|-------|
| 10436456 | Pros1     | 2.27 | 0.121 | 10508074 | Csf3r       | 3.92 | 0.380 | 10456904 | Pstpip2     | 3.55 | 0.060 |
| 10534493 | Ccl24     | 2.26 | 0.101 | 10389214 | Ccl9        | 3.80 | 0.075 | 10601385 | Tlr13       | 3.54 | 0.021 |
| 10603860 | Cfp       | 2.22 | 0.043 | 10445774 | 30306N03l   | 3.69 | 0.381 | 10606355 | Cysltr1     | 3.53 | 0.089 |
| 10445953 | Emr4      | 2.19 | 0.012 | 10523717 | Spp1        | 3.63 | 0.290 | 10534940 | Pilrb2      | 3.50 | 0.001 |
| 10537410 | Tbxas1    | 2.18 | 0.017 | 10557853 | 30325K18l   | 3.54 | 0.468 | 10363070 | Gp49a       | 3.47 | 0.092 |
| 10489569 | Pltp      | 2.17 | 0.115 | 10358339 | Cfh         | 3.38 | 0.417 | 10446928 | Ltbp1       | 3.45 | 0.072 |
| 10489246 | Mafb      | 2.17 | 0.215 | 10443463 | Cdkn1a      | 3.37 | 0.291 | 10593449 | Layn        | 3.45 | 0.025 |
| 10489463 | Slpi      | 2.17 | 0.012 | 10408693 | F13a1       | 3.33 | 0.094 | 10547689 | Vmn2r26     | 3.42 | 0.089 |
| 10603706 | Med4      | 2.16 | 0.072 | 10581882 | Ctrb1       | 3.32 | 0.097 | 10452648 | Emilin2     | 3.39 | 0.092 |
| 10482448 | Zeb2      | 2.16 | 0.094 | 10537650 | Prss1       | 3.22 | 0.497 | 10570291 | F10         | 3.34 | 0.045 |
| 10467258 | Myof      | 2.15 | 0.102 | 10527638 | Alox5ap     | 3.21 | 0.207 | 10562709 | Cd33        | 3.24 | 0.073 |
| 10466210 | Ms4a6d    | 2.15 | 0.134 | 10424683 | Ly6g        | 3.20 | 0.179 | 10478048 | Lbp         | 3.23 | 0.034 |
| 10541564 | Clec4a3   | 2.14 | 0.055 | 10514275 | Ptplad2     | 3.14 | 0.198 | 10578123 | Rbpms       | 3.22 | 0.076 |
| 10466606 | Anxa1     | 2.14 | 0.006 | 10419563 | Rnase1      | 3.10 | 0.070 | 10495596 | Frrs1       | 3.21 | 0.049 |
| 10488382 | Cd93      | 2.13 | 0.017 | 10432652 | Cela1       | 3.08 | 0.099 | 10431697 | Abcd2       | 3.21 | 0.026 |
| 10392464 | Fam20a    | 2.13 | 0.002 | 10440491 | App         | 3.07 | 0.150 | 10349166 | ierpinb10-p | 3.18 | 0.022 |
| 10471721 | Ptgs1     | 2.13 | 0.041 | 10578264 | Msr1        | 3.07 | 0.363 | 10534935 | Pilrb1      | 3.15 | 0.004 |
| 10517568 | Gm13011   | 2.13 | 0.037 | 10436095 | Retnla      | 3.04 | 0.154 | 10453857 | Gata6       | 3.14 | 0.090 |
| 10349661 | 30435G22l | 2.10 | 0.084 | 10351509 | Fcgr4       | 3.03 | 0.083 | 10476648 | Dstn        | 3.12 | 0.014 |
| 10398859 | Adssl1    | 2.09 | 0.128 | 10400844 | Pygl        | 2.99 | 0.414 | 10425852 | Parvb       | 3.09 | 0.076 |
| 10393559 | Timp2     | 2.09 | 0.008 | 10494369 | Sf3b4       | 2.97 | 0.256 | 10561008 | Ceacam1     | 3.08 | 0.056 |
| 10569707 | Myadm     | 2.08 | 0.047 | 10349166 | ierpinb10-p | 2.95 | 0.302 | 10481772 | Garnl3      | 3.07 | 0.094 |
| 10545182 | Gm459     | 2.07 | 0.068 | 10488382 | Cd93        | 2.89 | 0.081 | 10526783 | BC055004    | 3.05 | 0.095 |
| 10606355 | Cysltr1   | 2.07 | 0.020 | 10435501 | Stfa1       | 2.89 | 0.398 | 10436590 | 10055G20l   | 3.03 | 0.096 |
| 10541555 | Clec4a1   | 2.06 | 0.079 | 10431697 | Abcd2       | 2.87 | 0.069 | 10358879 | Npl         | 3.03 | 0.114 |
| 10349968 | Chi3l1    | 2.05 | 0.084 | 10387536 | Cd68        | 2.87 | 0.060 | 10452815 | Xdh         | 3.01 | 0.096 |
| 10534940 | Pilrb2    | 2.05 | 0.131 | 10605848 | Vsig4       | 2.81 | 0.068 | 10375051 | Hba-a1      | 3.00 | 0.151 |
| 10576784 | Cd209a    | 2.04 | 0.019 | 10520862 | Fosl2       | 2.79 | 0.463 | 10482448 | Zeb2        | 2.98 | 0.051 |
| 10422822 | Lifr      | 2.03 | 0.058 | 10537410 | Tbxas1      | 2.74 | 0.314 | 10577641 | 10011O10l   | 2.98 | 0.001 |
| 10385504 | Gm5431    | 2.02 | 0.103 | 10442596 | Sepx1       | 2.73 | 0.207 | 10571444 | Slc7a2      | 2.97 | 0.012 |
|          |           |      |       | 10439296 | Stfa2       | 2.73 | 0.047 | 10565962 | P2ry2       | 2.96 | 0.062 |
|          |           |      |       | 10360040 | Fcgr3       | 2.72 | 0.372 | 10466210 | Ms4a6d      | 2.95 | 0.104 |
|          |           |      |       | 10472350 | Gca         | 2.68 | 0.334 | 10449284 | Dusp1       | 2.94 | 0.104 |
|          |           |      |       | 10598004 | Ccr1        | 2.67 | 0.393 | 10527638 | Alox5ap     | 2.91 | 0.063 |
|          |           |      |       | 10602221 | Mir680-2    | 2.64 | 0.102 | 10402268 | Lgmn        | 2.91 | 0.079 |
|          |           |      |       | 10548375 | Clec7a      | 2.64 | 0.427 | 10603708 | Cask        | 2.91 | 0.035 |
|          |           |      |       | 10464560 | Aldh3b1     | 2.64 | 0.011 | 10560919 | Atp1a3      | 2.90 | 0.112 |
|          |           |      |       | 10361995 | Fam54a      | 2.62 | 0.116 | 10383756 | Ifitm2      | 2.90 | 0.032 |
|          |           |      |       | 10503709 | 30062J21f   | 2.60 | 0.122 | 10376201 | Gpx3        | 2.90 | 0.032 |
|          |           |      |       | 10482030 | Stom        | 2.59 | 0.560 | 10358434 | Pla2g4a     | 2.86 | 0.115 |
|          |           |      |       | 10547153 | Alox5       | 2.58 | 0.114 | 10367822 | Rab32       | 2.84 | 0.029 |
|          |           |      |       | 10373223 | Lrp1        | 2.58 | 0.356 | 10548375 | Clec7a      | 2.84 | 0.119 |
|          |           |      |       | 10597279 | Ccr12       | 2.56 | 0.224 | 10553299 | Ifitm2      | 2.83 | 0.046 |
|          |           |      |       | 10409278 | Nfil3       | 2.55 | 0.345 | 10558345 | Dock1       | 2.81 | 0.093 |
|          |           |      |       | 10351206 | Selp        | 2.55 | 0.111 | 10476401 | Plcb1       | 2.80 | 0.117 |
|          |           |      |       | 10561008 | Ceacam1     | 2.53 | 0.112 | 10570280 | F7          | 2.78 | 0.114 |
|          |           |      |       | 10495054 | Rhoc        | 2.53 | 0.173 | 10576911 | Efnb2       | 2.78 | 0.078 |
|          |           |      |       | 10523359 | Cxcl13      | 2.51 | 0.090 | 10412562 | Flnb        | 2.78 | 0.096 |
|          |           |      |       | 10607868 | Tlr8        | 2.50 | 0.105 | 10439895 | Alcam       | 2.74 | 0.080 |
|          |           |      |       | 10376513 | Nlrp3       | 2.49 | 0.377 | 10487238 | Hdc         | 2.74 | 0.069 |
|          |           |      |       | 10368277 | Rps12       | 2.49 | 0.357 | 10489878 | Ptgis       | 2.73 | 0.045 |
|          |           |      |       | 10502224 | Sgms2       | 2.48 | 0.402 | 10532133 | Evi5        | 2.72 | 0.014 |
|          |           |      |       | 10547657 | C3ar1       | 2.46 | 0.458 | 10383799 | Tcn2        | 2.71 | 0.029 |
|          |           |      |       | 10346960 | Ccnyl1      | 2.45 | 0.037 | 10392560 | Abca9       | 2.71 | 0.019 |
|          |           |      |       | 10417144 | Timm8a2     | 2.44 | 0.050 | 10572897 | Hmox1       | 2.71 | 0.144 |
|          |           |      |       | 10574166 | Cpne2       | 2.43 | 0.055 | 10374453 | Glul        | 2.71 | 0.067 |
|          |           |      |       | 10372652 | Lyz1        | 2.43 | 0.160 | 10367816 | 30014G24l   | 2.71 | 0.053 |

|          |            |      |       |          |           |      |       |
|----------|------------|------|-------|----------|-----------|------|-------|
| 10542470 | Mgst1      | 2.42 | 0.226 | 10567355 | Gprc5b    | 2.71 | 0.132 |
| 10475946 | Zc3h6      | 2.42 | 0.279 | 10476759 | Rin2      | 2.70 | 0.026 |
| 10595033 | Scg3       | 2.39 | 0.120 | 10482920 | Cd302     | 2.70 | 0.035 |
| 10410124 | Ctsl       | 2.38 | 0.182 | 10453747 | Colec12   | 2.70 | 0.138 |
| 10457733 | B4galt6    | 2.38 | 0.160 | 10358038 | Rnpep     | 2.68 | 0.121 |
| 10344966 | Ly96       | 2.36 | 0.066 | 10405870 | Vmn2r122  | 2.67 | 0.087 |
| 10425066 | Csf2rb     | 2.35 | 0.142 | 10367805 | 30014G24f | 2.67 | 0.086 |
| 10370573 | Theg       | 2.34 | 0.175 | 10350753 | Glul      | 2.67 | 0.048 |
| 10481518 | Ptges      | 2.33 | 0.319 | 10514590 | Dock7     | 2.67 | 0.134 |
| 10452316 | C3         | 2.33 | 0.284 | 10569017 | Ifitm3    | 2.65 | 0.049 |
| 10356932 | D1Ert622e  | 2.32 | 0.353 | 10358091 | Nav1      | 2.65 | 0.097 |
| 10452485 | Rab31      | 2.32 | 0.206 | 10501762 | Snx7      | 2.65 | 0.110 |
| 10438769 | Cldn1      | 2.31 | 0.357 | 10414537 | Rnase4    | 2.64 | 0.114 |
| 10439292 | BC100530   | 2.30 | 0.171 | 10458663 | Dpysl3    | 2.64 | 0.110 |
| 10576807 | Cd209d     | 2.29 | 0.277 | 10404965 | Rnf144b   | 2.62 | 0.154 |
| 10468893 | Csf2ra     | 2.29 | 0.172 | 10448676 | Slc9a3r2  | 2.62 | 0.110 |
| 10528207 | Cd36       | 2.29 | 0.269 | 10607868 | Tlr8      | 2.62 | 0.076 |
| 10405587 | Tgfbi      | 2.27 | 0.297 | 10489569 | Pltp      | 2.60 | 0.095 |
| 10583312 | Taf1d      | 2.26 | 0.285 | 10600852 | 30028010f | 2.60 | 0.017 |
| 10553598 | Cyfp1      | 2.26 | 0.311 | 10436892 | Itsn1     | 2.59 | 0.104 |
| 10392845 | Cd300lf    | 2.25 | 0.203 | 10435704 | Cd80      | 2.59 | 0.044 |
| 10508734 | Ptafr      | 2.24 | 0.221 | 10351509 | Fcgr4     | 2.58 | 0.040 |
| 10568873 | Adam8      | 2.24 | 0.202 | 10567995 | Nupr1     | 2.58 | 0.123 |
| 10458828 | Cdo1       | 2.23 | 0.494 | 10406934 | Etv1      | 2.57 | 0.080 |
| 10378568 | Mir22      | 2.23 | 0.369 | 10351400 | Fam78b    | 2.57 | 0.038 |
| 10388938 | Wsb1       | 2.23 | 0.014 | 10410204 | Nlrp4f    | 2.57 | 0.091 |
| 10603708 | Cask       | 2.22 | 0.225 | 10537785 | Tas2r143  | 2.56 | 0.111 |
| 10531794 | Wdfy3      | 2.22 | 0.075 | 10542470 | Mgst1     | 2.55 | 0.000 |
| 10354168 | Tbc1d8     | 2.22 | 0.490 | 10468893 | Csf2ra    | 2.54 | 0.019 |
| 10456904 | Pstpip2    | 2.21 | 0.130 | 10555027 | Gab2      | 2.53 | 0.089 |
| 10487823 | Siglec1    | 2.21 | 0.371 | 10543017 | Pdk4      | 2.53 | 0.048 |
| 10361748 | Fbxo30     | 2.21 | 0.425 | 10487588 | Il1a      | 2.53 | 0.020 |
| 10578361 | Asah1      | 2.21 | 0.235 | 10579054 | 30467E23f | 2.52 | 0.151 |
| 10482448 | Zeb2       | 2.21 | 0.072 | 10549929 | Vmn2r33   | 2.51 | 0.141 |
| 10560919 | Atp1a3     | 2.20 | 0.146 | 10421269 | Sorbs3    | 2.51 | 0.040 |
| 10368486 | Rnf146     | 2.20 | 0.254 | 10353669 | 31408C20f | 2.49 | 0.096 |
| 10542221 | Mir680-1   | 2.19 | 0.082 | 10573939 | Lpcat2    | 2.49 | 0.073 |
| 10604832 | Mir505     | 2.19 | 0.282 | 10528183 | Speer4d   | 2.49 | 0.153 |
| 10497548 | Fndc3b     | 2.18 | 0.330 | 10344966 | Ly96      | 2.48 | 0.002 |
| 10392560 | Abca9      | 2.18 | 0.181 | 10405587 | Tgfbi     | 2.48 | 0.093 |
| 10518059 | Ctrc       | 2.17 | 0.254 | 10404996 | Ninj1     | 2.47 | 0.114 |
| 10367822 | Rab32      | 2.17 | 0.053 | 10411633 | Naip1     | 2.47 | 0.013 |
| 10392815 | AF251705   | 2.16 | 0.144 | 10528177 | Speer4e   | 2.44 | 0.146 |
| 10438017 | Fgd4       | 2.16 | 0.164 | 10379727 | Gm11428   | 2.43 | 0.004 |
| 10476759 | Rin2       | 2.16 | 0.206 | 10445293 | Pla2g7    | 2.42 | 0.011 |
| 10541587 | Clec4a2    | 2.16 | 0.058 | 10387536 | Cd68      | 2.39 | 0.090 |
| 10492964 | Cd5l       | 2.15 | 0.277 | 10569877 | 10033B17f | 2.37 | 0.005 |
| 10544084 | Zc3hav1l   | 2.15 | 0.272 | 10560886 | Cd177     | 2.36 | 0.093 |
| 10456071 | Csf1r      | 2.13 | 0.228 | 10548552 | Klra2     | 2.36 | 0.024 |
| 10399710 | Rsad2      | 2.13 | 0.338 | 10599174 | Il13ra1   | 2.36 | 0.061 |
| 10495596 | Frrs1      | 2.13 | 0.514 | 10464560 | Aldh3b1   | 2.35 | 0.137 |
| 10551696 | Rasgrp4    | 2.13 | 0.063 | 10443494 | Pi16      | 2.35 | 0.033 |
| 10475890 | Mertk      | 2.12 | 0.050 | 10549921 | Vmn2r43   | 2.34 | 0.173 |
| 10404702 | Gcnt2      | 2.12 | 0.169 | 10456071 | Csf1r     | 2.34 | 0.164 |
| 10582985 | Casp1      | 2.10 | 0.075 | 10435948 | Ccdc80    | 2.34 | 0.018 |
| 10410211 | Zfp640     | 2.09 | 0.514 | 10406334 | Mctp1     | 2.34 | 0.170 |
| 10519811 | Speer8-ps1 | 2.09 | 0.415 | 10436596 | 10055G20f | 2.34 | 0.035 |

|          |          |      |       |          |           |      |       |
|----------|----------|------|-------|----------|-----------|------|-------|
| 10446229 | Tnfsf9   | 2.09 | 0.132 | 10578361 | Asah1     | 2.33 | 0.080 |
| 10378857 | Coro6    | 2.09 | 0.321 | 10577388 | 30467E23f | 2.33 | 0.171 |
| 10430931 | Nfam1    | 2.08 | 0.090 | 10395457 | Etv1      | 2.33 | 0.052 |
| 10578123 | Rbpms    | 2.07 | 0.328 | 10517513 | C1qc      | 2.33 | 0.019 |
| 10541555 | Clec4a1  | 2.07 | 0.247 | 10565712 | Acer3     | 2.33 | 0.088 |
| 10367436 | Cd63     | 2.06 | 0.295 | 10381445 | Tmem106a  | 2.32 | 0.102 |
| 10579925 | Gab1     | 2.06 | 0.025 | 10511446 | Asph      | 2.32 | 0.004 |
| 10520388 | Rbm33    | 2.06 | 0.421 | 10475532 | Sqrdl     | 2.32 | 0.023 |
| 10517614 | Fam43b   | 2.06 | 0.234 | 10355403 | Fn1       | 2.31 | 0.065 |
| 10570291 | F10      | 2.06 | 0.170 | 10387568 | BC096441  | 2.31 | 0.074 |
| 10505064 | Tmem38b  | 2.06 | 0.088 | 10551883 | Tyrobp    | 2.31 | 0.061 |
| 10367400 | Mmp19    | 2.05 | 0.098 | 10551696 | Rasgrp4   | 2.29 | 0.161 |
| 10581336 | Gfod2    | 2.04 | 0.341 | 10381588 | Grn       | 2.29 | 0.074 |
| 10593497 | Zc3h12c  | 2.04 | 0.358 | 10553598 | Cytip1    | 2.28 | 0.141 |
| 10493820 | S100a6   | 2.04 | 0.145 | 10531796 | Wdfy3     | 2.28 | 0.158 |
| 10452815 | Xdh      | 2.03 | 0.439 | 10470446 | Rxra      | 2.27 | 0.166 |
| 10555027 | Gab2     | 2.03 | 0.256 | 10448124 | Fpr1      | 2.27 | 0.066 |
| 10355403 | Fn1      | 2.03 | 0.399 | 10552140 | Cebpa     | 2.27 | 0.150 |
| 10445241 | Tnfrsf21 | 2.02 | 0.323 | 10404496 | Nqo2      | 2.26 | 0.009 |
| 10404187 | Tdp2     | 2.02 | 0.142 | 10574471 | Cmtm3     | 2.26 | 0.153 |
| 10392796 | Cd300lb  | 2.02 | 0.110 | 10501229 | Gstm1     | 2.25 | 0.052 |
| 10537785 | Tas2r143 | 2.02 | 0.062 | 10358476 | Prg4      | 2.25 | 0.125 |
| 10464084 | Tcf7l2   | 2.01 | 0.147 | 10464084 | Tcf7l2    | 2.25 | 0.066 |
| 10411611 | Naip5    | 2.01 | 0.417 | 10488378 | Thbd      | 2.24 | 0.175 |
| 10397346 | Fos      | 2.01 | 0.202 | 10546891 | Camk1     | 2.23 | 0.078 |
| 10442219 | Zfp52    | 2.00 | 0.209 | 10432682 | Krt80     | 2.23 | 0.038 |
| 10383799 | Tcn2     | 2.00 | 0.109 | 10602865 | Map3k15   | 2.22 | 0.033 |
|          |          |      |       | 10404053 | Hist1h2bc | 2.22 | 0.159 |
|          |          |      |       | 10505270 | Slc31a2   | 2.21 | 0.004 |
|          |          |      |       | 10566350 | 30023O14l | 2.20 | 0.131 |
|          |          |      |       | 10480842 | Tmem141   | 2.20 | 0.004 |
|          |          |      |       | 10563314 | Dhdh      | 2.20 | 0.004 |
|          |          |      |       | 10492682 | Fam198b   | 2.19 | 0.041 |
|          |          |      |       | 10438340 | Comt1     | 2.19 | 0.043 |
|          |          |      |       | 10529485 | Htra3     | 2.19 | 0.045 |
|          |          |      |       | 10559446 | Lilrb3    | 2.19 | 0.043 |
|          |          |      |       | 10594825 | Aqp9      | 2.19 | 0.093 |
|          |          |      |       | 10461587 | Ms4a4a    | 2.18 | 0.124 |
|          |          |      |       | 10495285 | Sort1     | 2.18 | 0.076 |
|          |          |      |       | 10588899 | Gpx1      | 2.18 | 0.118 |
|          |          |      |       | 10550509 | Pglyrp1   | 2.17 | 0.004 |
|          |          |      |       | 10372988 | Slc16a7   | 2.17 | 0.016 |
|          |          |      |       | 10564818 | Anpep     | 2.16 | 0.096 |
|          |          |      |       | 10603860 | Cfp       | 2.16 | 0.104 |
|          |          |      |       | 10468762 | 30506M07l | 2.16 | 0.128 |
|          |          |      |       | 10445753 | Trem3     | 2.16 | 0.187 |
|          |          |      |       | 10574023 | Mt2       | 2.16 | 0.117 |
|          |          |      |       | 10473809 | Sfpi1     | 2.15 | 0.087 |
|          |          |      |       | 10523128 | Pbbp      | 2.14 | 0.042 |
|          |          |      |       | 10363231 | Smpdl3a   | 2.14 | 0.019 |
|          |          |      |       | 10605370 | Mpp1      | 2.14 | 0.035 |
|          |          |      |       | 10604187 | Lamp2     | 2.14 | 0.038 |
|          |          |      |       | 10497265 | Fabp4     | 2.13 | 0.151 |
|          |          |      |       | 10517508 | C1qb      | 2.13 | 0.021 |
|          |          |      |       | 10419744 | Slc7a7    | 2.13 | 0.167 |
|          |          |      |       | 10411611 | Naip5     | 2.12 | 0.067 |
|          |          |      |       | 10534102 | Gusb      | 2.12 | 0.166 |

|          |            |      |       |
|----------|------------|------|-------|
| 10432540 | Lima1      | 2.12 | 0.133 |
| 10415844 | Ctsb       | 2.11 | 0.123 |
| 10517517 | C1qa       | 2.11 | 0.024 |
| 10345791 | Il1rl1     | 2.11 | 0.034 |
| 10388591 | Cpd        | 2.11 | 0.153 |
| 10392183 | Ern1       | 2.11 | 0.113 |
| 10530269 | Rbm47      | 2.11 | 0.188 |
| 10532169 | Mfsd7a     | 2.11 | 0.136 |
| 10550208 | Gm3994     | 2.11 | 0.184 |
| 10438639 | Dgkg       | 2.10 | 0.008 |
| 10526947 | 30050O18l  | 2.10 | 0.178 |
| 10445953 | Emr4       | 2.10 | 0.027 |
| 10367436 | Cd63       | 2.10 | 0.192 |
| 10567580 | Igsf6      | 2.09 | 0.028 |
| 10409278 | Nfil3      | 2.09 | 0.052 |
| 10382321 | Kcnj2      | 2.09 | 0.129 |
| 10519857 | Hgf        | 2.09 | 0.001 |
| 10528815 | J31410I06F | 2.08 | 0.169 |
| 10568001 | Sult1a1    | 2.08 | 0.132 |
| 10595404 | Fam46a     | 2.07 | 0.061 |
| 10550770 | Vmn1r114   | 2.07 | 0.082 |
| 10399308 | Fkbp1b     | 2.07 | 0.067 |
| 10500335 | Fcgr1      | 2.07 | 0.200 |
| 10424126 | Depdc6     | 2.07 | 0.105 |
| 10528804 | J31410I06F | 2.06 | 0.179 |
| 10438468 | Cyp2ab1    | 2.06 | 0.003 |
| 10530059 | Sel1l3     | 2.06 | 0.095 |
| 10559467 | Pira1      | 2.06 | 0.052 |
| 10560730 | Vmn1r93    | 2.06 | 0.101 |
| 10547177 | Rassf4     | 2.06 | 0.167 |
| 10543253 | Wnt2       | 2.05 | 0.035 |
| 10562720 | Siglece    | 2.05 | 0.177 |
| 10568605 | Ctbp2      | 2.05 | 0.211 |
| 10560618 | Apoc1      | 2.05 | 0.114 |
| 10506031 | Nfia       | 2.05 | 0.017 |
| 10348451 | Cxcr7      | 2.04 | 0.110 |
| 10566877 | Sbf2       | 2.04 | 0.059 |
| 10487011 | Gatm       | 2.04 | 0.146 |
| 10444016 | Pram1      | 2.04 | 0.179 |
| 10476395 | Bmp2       | 2.04 | 0.135 |
| 10595402 | Fam46a     | 2.04 | 0.113 |
| 10351347 | Creg1      | 2.04 | 0.050 |
| 10577757 | Adam9      | 2.04 | 0.183 |
| 10348354 | Ugt1a9     | 2.04 | 0.139 |
| 10356968 | Pam        | 2.03 | 0.188 |
| 10550189 | Gm10679    | 2.03 | 0.179 |
| 10421697 | 30625A04f  | 2.03 | 0.073 |
| 10497358 | Sirpb1b    | 2.03 | 0.109 |
| 10401829 | Gm8300     | 2.03 | 0.159 |
| 10560740 | Gm10670    | 2.03 | 0.128 |
| 10528821 | Gm10220    | 2.02 | 0.149 |
| 10436500 | Gbe1       | 2.02 | 0.014 |
| 10541555 | Clec4a1    | 2.02 | 0.126 |
| 10560785 | vmn1r-ps7f | 2.01 | 0.099 |
| 10596148 | Trf        | 2.01 | 0.073 |
| 10578324 | Mtus1      | 2.01 | 0.105 |
