# Supplementary material for: Epigenetic modulation of type-1 diabetes via a dual effect on pancreatic macrophages and β cells
Source: eLife journal article supplement (doi:10.7554/elife.04631), 2014-11-19
Supplement: supp [file elife-04631-supp-v1.zip]

## Supplementary File 2: Genes under-represented in pancreatic CD45<sup>+</sup> cells of NOD mice treated with I-BET151

| 2 wk treatment |               |                     |         | 12 hr treatment |             |                     |         | 24 hr treatment |             |                     |         | 48 hr treatment |             |                     |         |
|----------------|---------------|---------------------|---------|-----------------|-------------|---------------------|---------|-----------------|-------------|---------------------|---------|-----------------|-------------|---------------------|---------|
| Probe ID       | Gene Symbol   | FC<br>IBET/DMS<br>O | P value | Probe ID        | Gene Symbol | FC<br>IBET/DM<br>SO | P value | Probe ID        | Gene Symbol | FC<br>IBET/DMS<br>O | P value | Probe ID        | Gene Symbol | FC<br>IBET/DMS<br>O | P value |
| 10497337       | Car1          | 0.15                | 0.449   | 10545212        | Gm5574      | 0.05                | 0.002   | 10410386        | E430024C06F | 0.16                | 0.110   | 10410386        | E430024C0   | 0.32                | 0.042   |
| 10602372       | Alas2         | 0.17                | 0.024   | 10403011        | LOC674190   | 0.11                | 0.163   | 10501922        | Snhg8       | 0.25                | 0.015   | 10574149        | Nlrc5       | 0.43                | 0.000   |
| 10600480       | 4930408F14Ril | 0.20                | 0.413   | 10428973        | Gsdmc4      | 0.18                | 0.000   | 10408200        | Hist1h4f    | 0.30                | 0.018   | 10414734        | Gm13959     | 0.43                | 0.009   |
| 10498741       | Serpini2      | 0.22                | 0.014   | 10415431        | Mcpt1       | 0.21                | 0.000   | 10351043        | Snord47     | 0.31                | 0.200   | 10466054        | Cd6         | 0.44                | 0.002   |
| 10603242       | 4930408F14Ril | 0.23                | 0.421   | 10366446        | Tspan8      | 0.25                | 0.008   | 10392259        | Smurf2      | 0.31                | 0.217   | 10491091        | Tnfrsf10    | 0.44                | 0.048   |
| 10582545       | Mela          | 0.23                | 0.403   | 10428960        | Gsdmc2      | 0.27                | 0.001   | 10358399        | Rgs13       | 0.33                | 0.047   | 10414909        | Gm8721      | 0.45                | 0.072   |
| 10567366       | Gp2           | 0.24                | 0.048   | 10545205        | Gm1418      | 0.27                | 0.009   | 10503172        | Chd7        | 0.34                | 0.001   | 10574145        | Nlrc5       | 0.46                | 0.002   |
| 10542221       | Mir680-1      | 0.27                | 0.392   | 10415438        | Mcpt2       | 0.27                | 0.016   | 10604743        | Snord61     | 0.34                | 0.184   | 10415015        | Gm13949     | 0.46                | 0.016   |
| 10573054       | Gypa          | 0.27                | 0.261   | 10519811        | Speer8-ps1  | 0.28                | 0.004   | 10432176        | Snora34     | 0.37                | 0.232   | 10503212        | Chd7        | 0.47                | 0.023   |
| 10579054       | 4930467E23Ri  | 0.29                | 0.452   | 10395201        | Slc26a3     | 0.29                | 0.003   | 10505071        | Tmem38b     | 0.38                | 0.018   | 10392259        | Smurf2      | 0.47                | 0.050   |
| 10570634       | 4930467E23Ri  | 0.29                | 0.451   | 10545180        | Gm10879     | 0.30                | 0.179   | 10508719        | Snora16a    | 0.39                | 0.005   | 10469278        | Il2ra       | 0.48                | 0.022   |
| 10577361       | 4930467E23Ri  | 0.29                | 0.439   | 10545202        | Gm1077      | 0.30                | 0.045   | 10503212        | Chd7        | 0.39                | 0.001   | 10574137        | Nlrc5       | 0.48                | 0.009   |
| 10579060       | 4930467E23Ri  | 0.30                | 0.453   | 10559871        | Vmn2r34     | 0.30                | 0.001   | 10563108        | Snord35a    | 0.39                | 0.038   | 10571312        | Dusp4       | 0.48                | 0.002   |
| 10602221       | Mir680-2      | 0.30                | 0.424   | 10412517        | Gm3002      | 0.30                | 0.001   | 10403957        | Hist1h4m    | 0.39                | 0.142   | 10525365        | Hvcn1       | 0.48                | 0.041   |
| 10577388       | 4930467E23Ri  | 0.30                | 0.445   | 10537545        | Gm7254      | 0.30                | 0.002   | 10576216        | Snord68     | 0.40                | 0.024   | 10369867        | Tfam        | 0.48                | 0.048   |
| 10537014       | Cpa2          | 0.32                | 0.072   | 10492300        | Aadac       | 0.31                | 0.002   | 10548857        | Hist4h4     | 0.40                | 0.001   | 10376324        | Gm12250     | 0.49                | 0.005   |
| 10464298       | Pnlip         | 0.32                | 0.104   | 10499412        | Rab25       | 0.31                | 0.019   | 10408074        | Hist1h4k    | 0.41                | 0.001   | 10408200        | Hist1h4f    | 0.49                | 0.005   |
| 10598227       | 4930408F14Ril | 0.33                | 0.415   | 10559928        | Vmn2r51     | 0.32                | 0.001   | 10404051        | Hist1h4d    | 0.41                | 0.146   | 10493076        | Sh2d2a      | 0.49                | 0.020   |
| 10464328       | Pnliprp2      | 0.33                | 0.069   | 10419116        | Gm10375     | 0.32                | 0.003   | 10499130        | Rnu73b      | 0.41                | 0.002   | 10547894        | Cd4         | 0.49                | 0.001   |
| 10464313       | Pnliprp1      | 0.34                | 0.080   | 10570634        | 4930467E23F | 0.32                | 0.004   | 10404067        | Hist1h4b    | 0.41                | 0.000   | 10351880        | E430029J2   | 0.50                | 0.010   |
| 10566258       | Hbb-b2        | 0.34                | 0.086   | 10599075        | Gm10058     | 0.33                | 0.008   | 10438909        | Atp13a3     | 0.41                | 0.217   | 10450501        | Tnf         | 0.50                | 0.008   |
| 10566254       | Hbb-b1        | 0.34                | 0.085   | 10602221        | Mir680-2    | 0.33                | 0.050   | 10432640        | Bin2        | 0.42                | 0.123   | 10444306        | H2-Eb2      | 0.50                | 0.031   |
| 10545086       | Snca          | 0.34                | 0.009   | 10528177        | Speer4e     | 0.33                | 0.015   | 10593591        | Acat1       | 0.42                | 0.247   | 10554118        | Fam169b     | 0.50                | 0.004   |
| 10537634       | Try4          | 0.34                | 0.074   | 10603242        | 4930408F14F | 0.33                | 0.091   | 10353034        | Snord87     | 0.42                | 0.003   | 10425040        | Apol7e      | 0.50                | 0.001   |
| 10558159       | Dmbt1         | 0.35                | 0.193   | 10603986        | Gm10058     | 0.33                | 0.009   | 10415015        | Gm13949     | 0.42                | 0.303   |                 |             |                     |         |
| 10399710       | Rsad2         | 0.35                | 0.070   | 10549938        | Vmn2r34     | 0.33                | 0.001   | 10408243        | Hist1h4a    | 0.43                | 0.005   |                 |             |                     |         |
| 10599084       | 4930408F14Ril | 0.35                | 0.423   | 10419125        | Gm8005      | 0.33                | 0.001   | 10404024        | Hist1h4h    | 0.43                | 0.053   |                 |             |                     |         |
| 10459391       | Fech          | 0.35                | 0.065   | 10358027        | Elf3        | 0.33                | 0.009   | 10545192        | Rprl1       | 0.44                | 0.343   |                 |             |                     |         |
| 10417446       | 4930555G01Ri  | 0.35                | 0.423   | 10549923        | Vmn2r34     | 0.33                | 0.001   | 10408081        | Hist1h1b    | 0.44                | 0.117   |                 |             |                     |         |
| 10599673       | Slx1          | 0.36                | 0.455   | 10599096        | Gm10058     | 0.33                | 0.008   | 10500333        | Hist2h4     | 0.44                | 0.251   |                 |             |                     |         |
| 10473356       | Ube2l6        | 0.36                | 0.100   | 10375265        | Atp10b      | 0.34                | 0.001   | 10351039        | Gas5        | 0.44                | 0.378   |                 |             |                     |         |
| 10572527       | 4930467E23Ri  | 0.37                | 0.052   | 10528183        | Speer4d     | 0.34                | 0.006   | 10404061        | Hist1h2bb   | 0.44                | 0.200   |                 |             |                     |         |
| 10517573       | Cela3b        | 0.37                | 0.027   | 10559894        | Vmn2r34     | 0.34                | 0.001   | 10501046        | Gm10673     | 0.45                | 0.192   |                 |             |                     |         |
| 10519811       | Speer8-ps1    | 0.37                | 0.094   | 10363455        | Pcbd1       | 0.34                | 0.044   | 10394783        | Hpcal1      | 0.45                | 0.168   |                 |             |                     |         |
| 10490923       | Car2          | 0.38                | 0.101   | 10528191        | Speer4d     | 0.34                | 0.020   | 10597511        | Gm5921      | 0.45                | 0.382   |                 |             |                     |         |
| 10432652       | Cela1         | 0.39                | 0.025   | 10559509        | Cdc42ep5    | 0.35                | 0.037   | 10503198        | Chd7        | 0.46                | 0.163   |                 |             |                     |         |
| 10518059       | Ctrc          | 0.39                | 0.022   | 10579054        | 4930467E23F | 0.35                | 0.004   | 10537558        | Gm6273      | 0.46                | 0.234   |                 |             |                     |         |
| 10449245       | Pdia2         | 0.39                | 0.041   | 10419119        | Gm8165      | 0.35                | 0.004   | 10503176        | Chd7        | 0.46                | 0.114   |                 |             |                     |         |
| 10539200       | Reg1          | 0.39                | 0.083   | 10516765        | Serinc2     | 0.35                | 0.003   | 10503214        | Chd7        | 0.46                | 0.362   |                 |             |                     |         |
| 10537638       | Try10         | 0.40                | 0.001   | 10519805        | Speer4d     | 0.35                | 0.023   | 10380135        | Mir142      | 0.47                | 0.037   |                 |             |                     |         |
| 10510191       | Zfp600        | 0.40                | 0.070   | 10559883        | Vmn2r42     | 0.35                | 0.002   | 10503216        | Chd7        | 0.47                | 0.188   |                 |             |                     |         |
| 10528804       | 5031410I06Rik | 0.40                | 0.042   | 10599064        | Gm10058     | 0.35                | 0.009   | 10375935        | Skp1a       | 0.47                | 0.069   |                 |             |                     |         |
| 10551531       | Sycn          | 0.41                | 0.002   | 10560730        | Vmn1r93     | 0.35                | 0.002   | 10461152        | Snhg1       | 0.47                | 0.356   |                 |             |                     |         |
| 10481278       | Cel           | 0.42                | 0.040   | 10603953        | Gm5169      | 0.35                | 0.008   | 10384150        | Purb        | 0.48                | 0.163   |                 |             |                     |         |
| 10568502       | Cuzd1         | 0.42                | 0.048   | 10419122        | Gm8165      | 0.35                | 0.002   | 10379650        | Slfn3       | 0.48                | 0.113   |                 |             |                     |         |
| 10349648       | Ctse          | 0.42                | 0.029   | 10550760        | Vmn1r100    | 0.35                | 0.004   | 10498599        | Ift80       | 0.48                | 0.426   |                 |             |                     |         |
| 10513420       | Mup7          | 0.42                | 0.060   | 10559901        | Vmn2r42     | 0.35                | 0.002   | 10490302        | 2810021G02R | 0.48                | 0.008   |                 |             |                     |         |
| 10544333       | Try5          | 0.42                | 0.021   | 10550189        | Gm10679     | 0.35                | 0.003   | 10468292        | Pdcd11      | 0.48                | 0.428   |                 |             |                     |         |
| 10537179       | Bpgm          | 0.42                | 0.089   | 10558590        | Prap1       | 0.35                | 0.019   | 10461158        | Snhg1       | 0.48                | 0.551   |                 |             |                     |         |
| 10528815       | 5031410I06Rik | 0.43                | 0.001   | 10542221        | Mir680-1    | 0.35                | 0.076   | 10408225        | Hist1h4c    | 0.48                | 0.590   |                 |             |                     |         |
| 10497463       | Cpb1          | 0.43                | 0.092   | 10372557        | Gm239       | 0.35                | 0.008   | 10598049        | ND3         | 0.48                | 0.597   |                 |             |                     |         |

|          |               |      |       |          |             |      |       |          |          |      |       |
|----------|---------------|------|-------|----------|-------------|------|-------|----------|----------|------|-------|
| 10417319 | D830030K20Ri  | 0.43 | 0.072 | 10602009 | Rnf128      | 0.35 | 0.012 | 10442580 | Rps2     | 0.49 | 0.613 |
| 10563802 | Dbx1          | 0.43 | 0.025 | 10579060 | 4930467E23F | 0.36 | 0.003 | 10565514 | Tmem126a | 0.49 | 0.181 |
| 10513455 | Mup2          | 0.44 | 0.089 | 10549904 | Vmn2r37     | 0.36 | 0.002 | 10574149 | Nlrc5    | 0.49 | 0.422 |
| 10599088 | 4930408F14Ri  | 0.44 | 0.092 | 10550193 | Gm3994      | 0.36 | 0.007 | 10503174 | Chd7     | 0.49 | 0.819 |
| 10403046 | Al324046      | 0.44 | 0.045 | 10550770 | Vmn1r114    | 0.36 | 0.001 | 10563112 | Snord33  | 0.50 | 0.888 |
| 10501494 | Amy2b         | 0.45 | 0.073 | 10411668 | Ocln        | 0.36 | 0.009 | 10419733 | Gm6683   | 0.50 | 0.750 |
| 10513437 | Mup11         | 0.45 | 0.034 | 10492355 | Mme         | 0.36 | 0.028 |          |          |      |       |
| 10417366 | ENSMUSG000    | 0.45 | 0.076 | 10406176 | Slc9a3      | 0.36 | 0.001 |          |          |      |       |
| 10403034 | LOC100046271  | 0.46 | 0.049 | 10550208 | Gm3994      | 0.36 | 0.003 |          |          |      |       |
| 10375058 | Hba-a2        | 0.46 | 0.026 | 10559880 | Vmn2r33     | 0.36 | 0.001 |          |          |      |       |
| 10537650 | Prss1         | 0.46 | 0.022 | 10585010 | Apoa4       | 0.36 | 0.008 |          |          |      |       |
| 10513472 | Mup19         | 0.46 | 0.004 | 10603914 | Gm10058     | 0.36 | 0.003 |          |          |      |       |
| 10524698 | Pla2g1b       | 0.46 | 0.090 | 10560740 | Gm10670     | 0.36 | 0.003 |          |          |      |       |
| 10560481 | Fosb          | 0.47 | 0.014 | 10536563 | Cftr        | 0.36 | 0.020 |          |          |      |       |
| 10412211 | Gzma          | 0.47 | 0.076 | 10560744 | Vmn1r117    | 0.36 | 0.006 |          |          |      |       |
| 10518050 | Cela2a        | 0.47 | 0.056 | 10587323 | Gsta1       | 0.37 | 0.004 |          |          |      |       |
| 10527229 | 2810453l06Rik | 0.48 | 0.094 | 10416777 | Klf5        | 0.37 | 0.005 |          |          |      |       |
| 10420247 | Mcpt4         | 0.48 | 0.095 | 10560728 | Vmn1r158    | 0.37 | 0.003 |          |          |      |       |
| 10375051 | Hba-a1        | 0.48 | 0.096 | 10575052 | Cdh1        | 0.37 | 0.012 |          |          |      |       |
| 10501544 | Amy2a5        | 0.48 | 0.114 | 10560752 | Vmn1r125    | 0.37 | 0.002 |          |          |      |       |
| 10419082 | 5730469M10Ri  | 0.48 | 0.096 | 10389261 | Gm11437     | 0.37 | 0.005 |          |          |      |       |
| 10345436 | LOC280487     | 0.48 | 0.151 | 10419147 | Gm10375     | 0.37 | 0.003 |          |          |      |       |
| 10419563 | Rnase1        | 0.48 | 0.051 | 10560732 | Vmn1r-ps79  | 0.37 | 0.005 |          |          |      |       |
| 10501500 | Amy2a5        | 0.48 | 0.001 | 10560797 | Vmn1r-ps79  | 0.37 | 0.003 |          |          |      |       |
| 10438435 | Lamp3         | 0.48 | 0.012 | 10603936 | Gm5168      | 0.37 | 0.010 |          |          |      |       |
| 10513504 | Mup2          | 0.48 | 0.062 | 10442357 | Prss32      | 0.38 | 0.018 |          |          |      |       |
| 10593198 | Fam55b        | 0.49 | 0.104 | 10498710 | Bche        | 0.38 | 0.001 |          |          |      |       |
| 10461152 | Snhg1         | 0.49 | 0.104 | 10526514 | Cldn15      | 0.38 | 0.008 |          |          |      |       |
| 10412549 | D830030K20Ri  | 0.49 | 0.063 | 10603926 | Gm10058     | 0.38 | 0.016 |          |          |      |       |
|          |               |      |       | 10535174 | Tmem184a    | 0.38 | 0.010 |          |          |      |       |
|          |               |      |       | 10577388 | 4930467E23F | 0.38 | 0.006 |          |          |      |       |
|          |               |      |       | 10501218 | Gstm3       | 0.38 | 0.012 |          |          |      |       |
|          |               |      |       | 10560785 | Vmn1r-ps79  | 0.38 | 0.003 |          |          |      |       |
|          |               |      |       | 10419128 | Gm10375     | 0.38 | 0.003 |          |          |      |       |
|          |               |      |       | 10444554 | Slc44a4     | 0.38 | 0.007 |          |          |      |       |
|          |               |      |       | 10430909 | Cyp2d26     | 0.39 | 0.007 |          |          |      |       |
|          |               |      |       | 10428955 | Gsdmc2      | 0.39 | 0.003 |          |          |      |       |
|          |               |      |       | 10560795 | Vmn1r158    | 0.39 | 0.000 |          |          |      |       |
|          |               |      |       | 10463308 | Abcc2       | 0.40 | 0.007 |          |          |      |       |
|          |               |      |       | 10559908 | Vmn2r43     | 0.40 | 0.003 |          |          |      |       |
|          |               |      |       | 10549921 | Vmn2r43     | 0.40 | 0.001 |          |          |      |       |
|          |               |      |       | 10560780 | Vmn1r101    | 0.40 | 0.004 |          |          |      |       |
|          |               |      |       | 10407072 | Elovl7      | 0.40 | 0.005 |          |          |      |       |
|          |               |      |       | 10417411 | Gm3002      | 0.40 | 0.061 |          |          |      |       |
|          |               |      |       | 10539186 | Reg3a       | 0.40 | 0.006 |          |          |      |       |
|          |               |      |       | 10362511 | Gstm3       | 0.41 | 0.034 |          |          |      |       |
|          |               |      |       | 10419140 | Gm10375     | 0.41 | 0.006 |          |          |      |       |
|          |               |      |       | 10577361 | 4930467E23F | 0.41 | 0.006 |          |          |      |       |
|          |               |      |       | 10535559 | Baiap2l1    | 0.41 | 0.021 |          |          |      |       |
|          |               |      |       | 10578952 | BC030870    | 0.41 | 0.007 |          |          |      |       |

|          |             |      |       |
|----------|-------------|------|-------|
| 10465895 | Fads2       | 0.41 | 0.009 |
| 10514054 | Nfib        | 0.41 | 0.013 |
| 10462313 | Slc1a1      | 0.41 | 0.005 |
| 10428981 | Gsdmc4      | 0.42 | 0.022 |
| 10559890 | Vmn2r43     | 0.42 | 0.026 |
| 10419111 | Gm10375     | 0.42 | 0.013 |
| 10549917 | Vmn2r43     | 0.42 | 0.068 |
| 10587331 | Gsta1       | 0.42 | 0.003 |
| 10502565 | Clca2       | 0.42 | 0.008 |
| 10513420 | Mup7        | 0.42 | 0.026 |
| 10523563 | Cds1        | 0.42 | 0.007 |
| 10599673 | Slx1l       | 0.42 | 0.084 |
| 10513455 | Mup2        | 0.42 | 0.032 |
| 10495625 | Dpyd        | 0.43 | 0.004 |
| 10404649 | Dsp         | 0.43 | 0.016 |
| 10598203 | Ccl28       | 0.43 | 0.026 |
| 10504002 | Spink4      | 0.43 | 0.014 |
| 10487447 | Mall        | 0.43 | 0.033 |
| 10557165 | 2010110P09f | 0.43 | 0.004 |
| 10412537 | Gm3002      | 0.43 | 0.016 |
| 10496447 | Adh6a       | 0.43 | 0.007 |
| 10590844 | Arhgap42    | 0.43 | 0.032 |
| 10402575 | Degs2       | 0.43 | 0.034 |
| 10443786 | Pde9a       | 0.43 | 0.008 |
| 10559931 | Vmn2r43     | 0.43 | 0.002 |
| 10427075 | Krt18       | 0.43 | 0.009 |
| 10454172 | Dsg2        | 0.44 | 0.054 |
| 10405870 | Vmn2r122    | 0.44 | 0.036 |
| 10417371 | Gm3696      | 0.44 | 0.016 |
| 10417458 | Gm5458      | 0.44 | 0.090 |
| 10456653 | Myo5b       | 0.44 | 0.006 |
| 10485445 | Ehf         | 0.44 | 0.004 |
| 10555297 | Kcne3       | 0.44 | 0.011 |
| 10528815 | 5031410I06R | 0.44 | 0.011 |
| 10454881 | 0610010O12f | 0.44 | 0.014 |
| 10592084 | St3gal4     | 0.44 | 0.023 |
| 10351623 | F11r        | 0.44 | 0.017 |
| 10404051 | Hist1h4d    | 0.44 | 0.001 |
| 10528804 | 5031410I06R | 0.44 | 0.022 |
| 10572527 | 4930467E23f | 0.44 | 0.011 |
| 10463023 | Cyp2c66     | 0.45 | 0.003 |
| 10501811 | Slc44a3     | 0.45 | 0.000 |
| 10587446 | Myo6        | 0.45 | 0.045 |
| 10436773 | Gm7735      | 0.45 | 0.005 |
| 10477935 | Gm1332      | 0.45 | 0.032 |
| 10503023 | Cth         | 0.45 | 0.019 |
| 10466110 | Ms4a10      | 0.45 | 0.052 |
| 10549929 | Vmn2r33     | 0.45 | 0.001 |
| 10417226 | Gm3002      | 0.45 | 0.011 |
| 10417264 | Gm3002      | 0.45 | 0.023 |

|          |             |      |       |
|----------|-------------|------|-------|
| 10513437 | Mup11       | 0.45 | 0.037 |
| 10458704 | Spink3      | 0.45 | 0.025 |
| 10598227 | 4930408F14F | 0.45 | 0.072 |
| 10405876 | Gm10324     | 0.45 | 0.082 |
| 10493382 | Pklr        | 0.45 | 0.012 |
| 10496438 | Adh1        | 0.45 | 0.018 |
| 10417421 | Gm3696      | 0.46 | 0.012 |
| 10395925 | Mia2        | 0.46 | 0.016 |
| 10417302 | Gm3002      | 0.46 | 0.021 |
| 10423654 | Osr2        | 0.46 | 0.040 |
| 10443408 | Mapk13      | 0.46 | 0.011 |
| 10528821 | Gm10220     | 0.46 | 0.020 |
| 10389025 | Myo1d       | 0.46 | 0.014 |
| 10447239 | Abcg8       | 0.46 | 0.003 |
| 10511560 | Esrp1       | 0.47 | 0.012 |
| 10519652 | Gm6455      | 0.47 | 0.000 |
| 10356137 | Tm4sf20     | 0.47 | 0.002 |
| 10492136 | Dclk1       | 0.47 | 0.000 |
| 10550786 | Vmn1r132    | 0.47 | 0.002 |
| 10465521 | Plcb3       | 0.47 | 0.021 |
| 10417461 | Gm10406     | 0.47 | 0.017 |
| 10529824 | Prom1       | 0.47 | 0.007 |
| 10510221 | Gm3579      | 0.47 | 0.013 |
| 10519688 | Gm6455      | 0.47 | 0.002 |
| 10563802 | Dbx1        | 0.47 | 0.000 |
| 10389022 | Myo1d       | 0.47 | 0.017 |
| 10418169 | 1700054O19f | 0.47 | 0.051 |
| 10559420 | Tmc4        | 0.47 | 0.026 |
| 10560754 | Vmn1r132    | 0.47 | 0.002 |
| 10599084 | 4930408F14F | 0.47 | 0.077 |
| 10371230 | Gna11       | 0.48 | 0.065 |
| 10410204 | Nlrp4f      | 0.48 | 0.035 |
| 10445053 | Trim31      | 0.48 | 0.021 |
| 10438358 | 5-Sep       | 0.48 | 0.011 |
| 10501762 | Snx7        | 0.48 | 0.020 |
| 10545187 | Gm1502      | 0.48 | 0.034 |
| 10417258 | Gm3002      | 0.48 | 0.038 |
| 10441244 | Fam3b       | 0.48 | 0.021 |
| 10467041 | Asah2       | 0.48 | 0.023 |
| 10574532 | Ces2d-ps    | 0.48 | 0.017 |
| 10530615 | Ociad2      | 0.48 | 0.001 |
| 10417501 | Gm5458      | 0.48 | 0.078 |
| 10417359 | Gm3002      | 0.48 | 0.046 |
| 10345436 | LOC280487   | 0.48 | 0.176 |
| 10514510 | Cyp2j6      | 0.49 | 0.010 |
| 10417446 | 4930555G01f | 0.49 | 0.030 |
| 10513472 | Mup19       | 0.49 | 0.049 |
| 10466530 | Pcsk5       | 0.49 | 0.002 |
| 10417366 | ENSMUSG0C   | 0.49 | 0.054 |
| 10565627 | Aqp11       | 0.49 | 0.003 |
| 10565786 | Mogat2      | 0.49 | 0.009 |
| 10545958 | Anxa4       | 0.49 | 0.021 |
| 10347734 | Sgpp2       | 0.50 | 0.012 |
| 10417286 | Gm3002      | 0.50 | 0.017 |
| 10417326 | Gm3002      | 0.50 | 0.018 |
| 10597817 | Cck         | 0.50 | 0.009 |
| 10370552 | Ppap2c      | 0.50 | 0.019 |
| 10401829 | Gm8300      | 0.50 | 0.017 |
| 10409999 | Fbp2        | 0.50 | 0.023 |
| 10597960 | Slc6a20a    | 0.50 | 0.010 |
