# Supplementary material for: Epigenetic modulation of type-1 diabetes via a dual effect on pancreatic macrophages and β cells
Source: eLife journal article supplement (doi:10.7554/elife.04631), 2014-11-19
Supplement: supp [file elife-04631-supp-v1.zip]

**Supplementary File 4:**  
**Transcripts over-represented**  
**in  $\beta$  cells of NOD mice**  
**treated with I-BET151**

| Probe ID | Gene<br>Symbol | FC<br>IBET/DMSO | P<br>value |
|----------|----------------|-----------------|------------|
| 10563597 | Saa3           | 16.20           | 0.033      |
| 10358476 | Prg4           | 9.56            | 0.024      |
| 10539179 | Reg3b          | 8.42            | 0.038      |
| 10363224 | Fabp7          | 7.46            | 0.014      |
| 10464905 | Npas4          | 4.87            | 0.025      |
| 10476512 | Snap25         | 4.76            | 0.018      |
| 10349968 | Chi3l1         | 4.76            | 0.045      |
| 10512279 | Cntfr          | 4.64            | 0.017      |
| 10367582 | Vip            | 4.63            | 0.003      |
| 10539194 | Reg2           | 4.21            | 0.036      |
| 10458247 | Lrrtm2         | 4.11            | 0.029      |
| 10399407 | Vsnl1          | 4.06            | 0.019      |
| 10539186 | Reg3a          | 3.97            | 0.037      |
| 10602688 | Usp51          | 3.91            | 0.030      |
| 10545561 | Reg3d          | 3.83            | 0.011      |
| 10570741 | Defb1          | 3.75            | 0.024      |
| 10467887 | Cpn1           | 3.71            | 0.012      |
| 10547282 | Zfp9           | 3.64            | 0.024      |
| 10462912 | Lgi1           | 3.63            | 0.028      |
| 10484276 | Neurod1        | 3.61            | 0.030      |
| 10443690 | Glp1r          | 3.28            | 0.025      |
| 10545569 | Reg3g          | 2.94            | 0.034      |
| 10527565 | Pdx1           | 2.82            | 0.023      |
| 10474312 | Pax6           | 2.79            | 0.030      |
| 10493052 | Insrr          | 2.70            | 0.038      |
| 10531790 | Nkx6-1         | 2.69            | 0.020      |
| 10488366 | Nkx2-2         | 2.61            | 0.027      |
| 10580522 | Tox3           | 2.59            | 0.027      |
| 10596200 | Tmem108        | 2.59            | 0.030      |
| 10531100 | Sult1d1        | 2.58            | 0.036      |
| 10349157 | Serpib2        | 2.58            | 0.023      |
| 10529605 | Wfs1           | 2.57            | 0.024      |
| 10428619 | Enpp2          | 2.56            | 0.041      |
| 10598603 | Syt15          | 2.56            | 0.029      |
| 10398442 | Mir410         | 2.56            | 0.036      |
| 10420730 | Fdft1          | 2.56            | 0.022      |
| 10454192 | Ttr            | 2.56            | 0.026      |
| 10568318 | Prss53         | 2.56            | 0.029      |
| 10379765 | Hnf1b          | 2.55            | 0.012      |
| 10578916 | Sc4mol         | 2.53            | 0.042      |
| 10494735 | Gdap2          | 2.52            | 0.032      |
| 10506594 | Acot11         | 2.50            | 0.023      |
| 10571567 | Sorbs2         | 2.50            | 0.029      |
| 10602009 | Rnf128         | 2.50            | 0.028      |
| 10506004 | Hook1          | 2.48            | 0.038      |
| 10526277 | Mlxipl         | 2.48            | 0.032      |
| 10595033 | Scg3           | 2.48            | 0.036      |
| 10543120 | Ica1           | 2.48            | 0.036      |
| 10601312 | Chic1          | 2.48            | 0.036      |
| 10357535 | Pfkfb2         | 2.47            | 0.030      |
| 10347036 | Mtap2          | 2.46            | 0.034      |
| 10359754 | Mpzl1          | 2.46            | 0.034      |
| 10362379 | Echdc1         | 2.44            | 0.010      |
| 10511819 | Khlh32         | 2.44            | 0.030      |

|          |            |      |       |
|----------|------------|------|-------|
| 10545242 | Igk-V19-20 | 2.44 | 0.050 |
| 10561927 | Aplp1      | 2.44 | 0.030 |
| 10477644 | Trp53inp2  | 2.43 | 0.021 |
| 10602068 | Mid2       | 2.43 | 0.033 |
| 10346878 | Zdbf2      | 2.43 | 0.042 |
| 10442887 | Fbxl16     | 2.42 | 0.027 |
| 10603814 | Slc9a7     | 2.42 | 0.036 |
| 10355024 | Ica1l      | 2.42 | 0.020 |
| 10463355 | Scd2       | 2.42 | 0.029 |
| 10502224 | Sgms2      | 2.41 | 0.029 |
| 10503218 | Chd7       | 2.40 | 0.037 |
| 10528008 | Steap2     | 2.40 | 0.019 |
| 10363455 | Pcbd1      | 2.40 | 0.012 |
| 10483719 | Chn1       | 2.40 | 0.027 |
| 10419015 | Cdhr1      | 2.40 | 0.034 |
| 10473312 | Fam171b    | 2.39 | 0.036 |
| 10488387 | Napb       | 2.39 | 0.018 |
| 10492964 | Cd5l       | 2.38 | 0.020 |
| 10368527 | Hint3      | 2.38 | 0.023 |
| 10377431 | Vamp2      | 2.38 | 0.015 |
| 10398432 | Mir377     | 2.38 | 0.050 |
| 10531869 | Mapk10     | 2.38 | 0.027 |
| 10411804 | Mast4      | 2.37 | 0.036 |
| 10362472 | Rsph4a     | 2.37 | 0.019 |
| 10482772 | Nr4a2      | 2.36 | 0.031 |
| 10529979 | Ppargc1a   | 2.36 | 0.027 |
| 10398075 | Serpina3n  | 2.36 | 0.018 |
| 10476633 | Pcsk2      | 2.36 | 0.039 |
| 10554240 | Isg20      | 2.36 | 0.020 |
| 10606315 | Taf9b      | 2.36 | 0.010 |
| 10384064 | Camk2b     | 2.35 | 0.029 |
| 10474814 | Disp2      | 2.35 | 0.041 |
| 10381574 | Rundc3a    | 2.34 | 0.030 |
| 10508770 | Gm13033    | 2.34 | 0.030 |
| 10559790 | Zim1       | 2.34 | 0.028 |
| 10428089 | Nipal2     | 2.34 | 0.022 |
| 10505705 | Sh3gl2     | 2.34 | 0.023 |
| 10463997 | Pdcd4      | 2.33 | 0.027 |
| 10506883 | Rab3b      | 2.33 | 0.006 |
| 10411332 | Hmgcr      | 2.33 | 0.037 |
| 10423024 | Capsl      | 2.33 | 0.028 |
| 10445338 | Enpp5      | 2.33 | 0.036 |
| 10496854 | Ttll7      | 2.33 | 0.026 |
| 10485979 | Gjd2       | 2.32 | 0.033 |
| 10402195 | Tc2n       | 2.32 | 0.007 |
| 10530615 | Ociad2     | 2.32 | 0.016 |
| 10596051 | Tmem22     | 2.32 | 0.042 |
| 10431915 | Slc38a4    | 2.32 | 0.032 |
| 10369481 | H2afy2     | 2.31 | 0.016 |
| 10379215 | Ift20      | 2.31 | 0.016 |
| 10475378 | Casc4      | 2.31 | 0.038 |
| 10565627 | Aqp11      | 2.31 | 0.025 |
| 10380303 | Car10      | 2.31 | 0.026 |
| 10406229 | Pcsk1      | 2.31 | 0.031 |
| 10481627 | Lcn2       | 2.30 | 0.044 |
| 10575153 | Cyb5b      | 2.30 | 0.025 |
| 10473349 | Ypel4      | 2.30 | 0.024 |
| 10499412 | Rab25      | 2.30 | 0.008 |
| 10359689 | Atp1b1     | 2.29 | 0.030 |
| 10462507 | Papss2     | 2.29 | 0.033 |
| 10359851 | Uck2       | 2.29 | 0.029 |
| 10407431 | Ucn3       | 2.29 | 0.025 |
| 10514240 | Slc24a2    | 2.29 | 0.029 |

|          |             |      |       |
|----------|-------------|------|-------|
| 10368918 | Sobp        | 2.29 | 0.023 |
| 10368577 | Rnf217      | 2.28 | 0.032 |
| 10491171 | Slc2a2      | 2.28 | 0.037 |
| 10373515 | Suox        | 2.28 | 0.025 |
| 10388880 | Tmem97      | 2.28 | 0.001 |
| 10415980 | Fbxo16      | 2.28 | 0.030 |
| 10442238 | 110052M02R  | 2.27 | 0.013 |
| 10408268 | Scgn        | 2.27 | 0.028 |
| 10464030 | Adra2a      | 2.27 | 0.028 |
| 10501374 | 330417C22Ri | 2.27 | 0.030 |
| 10501802 | Tmem56      | 2.27 | 0.043 |
| 10574259 | Gpr56       | 2.27 | 0.033 |
| 10392910 | 630004H02R  | 2.26 | 0.036 |
| 10406852 | Cnn3        | 2.26 | 0.041 |
| 10478374 | Gdap1l1     | 2.26 | 0.023 |
| 10359908 | Rgs4        | 2.26 | 0.037 |
| 10364784 | Reep6       | 2.26 | 0.024 |
| 10557124 | Scnn1b      | 2.26 | 0.023 |
| 10499483 | Fdps        | 2.25 | 0.025 |
| 10368101 | D10Bwg1379c | 2.24 | 0.042 |
| 10465701 | Lgals12     | 2.24 | 0.023 |
| 10351971 | Fmn2        | 2.24 | 0.037 |
| 10423030 | Prlr        | 2.24 | 0.035 |
| 10474229 | Cd59a       | 2.24 | 0.020 |
| 10573979 | Gnao1       | 2.24 | 0.030 |
| 10601296 | ---         | 2.24 | 0.024 |
| 10412466 | Hmgcs1      | 2.24 | 0.044 |
| 10559796 | Peg3        | 2.24 | 0.043 |
| 10345762 | Il1r1       | 2.23 | 0.033 |
| 10422244 | Slitrk6     | 2.23 | 0.025 |
| 10519855 | Cacna2d1    | 2.23 | 0.033 |
| 10513869 | Megf9       | 2.23 | 0.034 |
| 10486710 | Lcmt2       | 2.22 | 0.016 |
| 10538247 | Npy         | 2.22 | 0.006 |
| 10453256 | Kcng3       | 2.22 | 0.033 |
| 10531653 | Tmem150c    | 2.22 | 0.025 |
| 10532944 | Mlec        | 2.22 | 0.028 |
| 10534021 | Rimbp2      | 2.22 | 0.036 |
| 10430438 | Ankrd54     | 2.21 | 0.013 |
| 10344679 | St18        | 2.21 | 0.036 |
| 10556426 | Parva       | 2.21 | 0.023 |
| 10582545 | Mela        | 2.21 | 0.056 |
| 10479761 | Meig1       | 2.19 | 0.008 |
| 10385096 | Kcnip1      | 2.19 | 0.037 |
| 10516064 | Mfsd2a      | 2.19 | 0.031 |
| 10535174 | Tmem184a    | 2.19 | 0.029 |
| 10456353 | Grp         | 2.19 | 0.028 |
| 10533401 | Cux2        | 2.18 | 0.022 |
| 10534395 | Cldn4       | 2.18 | 0.042 |
| 10359849 | Uck2        | 2.18 | 0.032 |
| 10447100 | Morn2       | 2.18 | 0.016 |
| 10495794 | Pde5a       | 2.18 | 0.019 |
| 10495993 | Elovl6      | 2.18 | 0.031 |
| 10497663 | Slc7a14     | 2.18 | 0.036 |
| 10361191 | Syt14       | 2.17 | 0.036 |
| 10384940 | Erlec1      | 2.17 | 0.023 |
| 10404792 | Phactr1     | 2.17 | 0.037 |
| 10415784 | Trim13      | 2.17 | 0.004 |
| 10427075 | Krt18       | 2.17 | 0.036 |
| 10481518 | Ptges       | 2.17 | 0.031 |
| 10547322 | Cacna1c     | 2.17 | 0.034 |
| 10456836 | St8sia5     | 2.17 | 0.024 |
| 10399308 | Fkbp1b      | 2.17 | 0.016 |

|          |              |      |       |
|----------|--------------|------|-------|
| 10354529 | 700019D03Ri  | 2.17 | 0.037 |
| 10489463 | Sipi         | 2.17 | 0.037 |
| 10357371 | Tmem163      | 2.16 | 0.020 |
| 10358027 | Elf3         | 2.16 | 0.038 |
| 10356154 | Sphkap       | 2.16 | 0.030 |
| 10387855 | Alox15       | 2.16 | 0.037 |
| 10414192 | Mat1a        | 2.16 | 0.027 |
| 10590306 | Entpd3       | 2.16 | 0.024 |
| 10361642 | Lrp11        | 2.16 | 0.036 |
| 10365408 | Ric8b        | 2.16 | 0.031 |
| 10390691 | Nr1d1        | 2.16 | 0.033 |
| 10455374 | Stk32a       | 2.16 | 0.045 |
| 10509063 | Il22ra1      | 2.16 | 0.006 |
| 10519612 | 1330182L06Ri | 2.16 | 0.046 |
| 10590830 | AK129341     | 2.16 | 0.027 |
| 10596718 | Slc38a3      | 2.16 | 0.006 |
| 10398420 | Mir382       | 2.15 | 0.048 |
| 10427402 | Ghr          | 2.15 | 0.030 |
| 10355813 | Ptpn         | 2.14 | 0.027 |
| 10399121 | Ptpn2        | 2.14 | 0.034 |
| 10510413 | Gm572        | 2.14 | 0.030 |
| 10472235 | Dapl1        | 2.14 | 0.016 |
| 10400170 | Prkd1        | 2.14 | 0.030 |
| 10430956 | Cyb5r3       | 2.14 | 0.018 |
| 10494069 | Celf3        | 2.13 | 0.030 |
| 10463737 | Ina          | 2.13 | 0.018 |
| 10551852 | Clip3        | 2.13 | 0.020 |
| 10424349 | Sqle         | 2.13 | 0.042 |
| 10495285 | Sort1        | 2.13 | 0.021 |
| 10556442 | Tead1        | 2.13 | 0.025 |
| 10469622 | Gpr158       | 2.12 | 0.035 |
| 10451363 | Srf          | 2.12 | 0.027 |
| 10598359 | Syp          | 2.12 | 0.031 |
| 10485170 | Cry2         | 2.12 | 0.031 |
| 10403658 | Gng4         | 2.11 | 0.021 |
| 10559580 | Syt5         | 2.11 | 0.030 |
| 10509441 | Ece1         | 2.11 | 0.032 |
| 10564343 | Tjp1         | 2.11 | 0.038 |
| 10574033 | Nup93        | 2.11 | 0.036 |
| 10389795 | Stxbp4       | 2.11 | 0.017 |
| 10412909 | Fdft1        | 2.11 | 0.030 |
| 10419223 | Fermt2       | 2.11 | 0.034 |
| 10498907 | Glrb         | 2.11 | 0.039 |
| 10527323 | Bhlha15      | 2.11 | 0.002 |
| 10503222 | Chd7         | 2.10 | 0.036 |
| 10453373 | Prepl        | 2.10 | 0.033 |
| 10598493 | Pcsk1n       | 2.10 | 0.017 |
| 10347073 | Unc80        | 2.10 | 0.035 |
| 10361023 | Prox1        | 2.10 | 0.039 |
| 10423049 | Prlr         | 2.10 | 0.051 |
| 10437210 | Bace2        | 2.10 | 0.039 |
| 10604564 | Gpc4         | 2.10 | 0.034 |
| 10356968 | Pam          | 2.10 | 0.043 |
| 10466963 | 1930021J03Ri | 2.10 | 0.029 |
| 10501811 | Slc44a3      | 2.10 | 0.035 |
| 10457942 | Syt4         | 2.10 | 0.032 |
| 10486041 | Meis2        | 2.10 | 0.025 |
| 10389674 | Dynll2       | 2.09 | 0.017 |
| 10507015 | Agbl4        | 2.09 | 0.026 |
| 10350951 | Tnr          | 2.09 | 0.020 |
| 10396952 | Ttc9         | 2.09 | 0.040 |
| 10442236 | 110052M02R   | 2.09 | 0.031 |
| 10530089 | Cckar        | 2.09 | 0.009 |

|          |              |      |       |
|----------|--------------|------|-------|
| 10404702 | Gcnt2        | 2.08 | 0.036 |
| 10432032 | Vdr          | 2.08 | 0.023 |
| 10433782 | Efcab1       | 2.08 | 0.031 |
| 10353192 | Eya1         | 2.08 | 0.026 |
| 10434668 | Tmem97       | 2.07 | 0.002 |
| 10542917 | Hepacam2     | 2.07 | 0.039 |
| 10553773 | Gabrb3       | 2.07 | 0.032 |
| 10599927 | Aff2         | 2.07 | 0.034 |
| 10474972 | Chac1        | 2.07 | 0.024 |
| 10433163 | Ppp1r1a      | 2.07 | 0.021 |
| 10463732 | Ina          | 2.07 | 0.029 |
| 10502205 | Hadh         | 2.07 | 0.027 |
| 10531034 | Ugt2b34      | 2.07 | 0.041 |
| 10535577 | Tmem130      | 2.07 | 0.023 |
| 10386211 | Fam183b      | 2.07 | 0.014 |
| 10440918 | Tmem50b      | 2.07 | 0.019 |
| 10498210 | Nbea         | 2.07 | 0.039 |
| 10554269 | Abhd2        | 2.07 | 0.038 |
| 10422512 | A2ld1        | 2.06 | 0.011 |
| 10344805 | Cspp1        | 2.06 | 0.017 |
| 10474936 | Spint1       | 2.06 | 0.029 |
| 10598626 | Tspan7       | 2.06 | 0.028 |
| 10355960 | Scg2         | 2.06 | 0.037 |
| 10443535 | Tbc1d22b     | 2.06 | 0.032 |
| 10563487 | Abcc8        | 2.06 | 0.041 |
| 10398362 | AF357355     | 2.05 | 0.047 |
| 10424086 | Slc30a8      | 2.05 | 0.045 |
| 10369835 | Phyhipl      | 2.05 | 0.017 |
| 10511560 | Esrp1        | 2.05 | 0.039 |
| 10432918 | Krt8         | 2.05 | 0.030 |
| 10360418 | Rgs7         | 2.05 | 0.048 |
| 10377673 | Cldn7        | 2.05 | 0.041 |
| 10453518 | Nrxn1        | 2.05 | 0.043 |
| 10484307 | Frzb         | 2.05 | 0.035 |
| 10385495 | Cdk2ap1      | 2.04 | 0.009 |
| 10512807 | Gabbr2       | 2.04 | 0.039 |
| 10551215 | Rnf170       | 2.04 | 0.013 |
| 10551966 | Hspb6        | 2.04 | 0.028 |
| 10579799 | Tmem184c     | 2.04 | 0.026 |
| 10496438 | Adh1         | 2.04 | 0.040 |
| 10549842 | Zfp667       | 2.04 | 0.033 |
| 10378568 | Mir22        | 2.04 | 0.022 |
| 10603746 | Maob         | 2.04 | 0.034 |
| 10603573 | Syt15        | 2.04 | 0.037 |
| 10397882 | Chga         | 2.03 | 0.040 |
| 10432404 | Tuba1a       | 2.03 | 0.029 |
| 10565873 | Ppme1        | 2.03 | 0.041 |
| 10579724 | Slc35e1      | 2.03 | 0.028 |
| 10417807 | Kcnk16       | 2.03 | 0.028 |
| 10466886 | Glis3        | 2.03 | 0.026 |
| 10430804 | Pppde2       | 2.02 | 0.024 |
| 10531149 | Gc           | 2.02 | 0.033 |
| 10409330 | I833439L19Ri | 2.02 | 0.022 |
| 10533807 | Cdk2ap1      | 2.02 | 0.009 |
| 10383671 | Drg1         | 2.02 | 0.009 |
| 10411519 | Mtap1b       | 2.02 | 0.036 |
| 10464471 | Gal          | 2.02 | 0.017 |
| 10519770 | Pclo         | 2.02 | 0.030 |
| 10540401 | Lrrn1        | 2.00 | 0.026 |
| 10585851 | Hcn4         | 2.00 | 0.032 |
